# Supplementary material
Source: publisher figshare collection journal article supplement (https://gsajournals.figshare.com/ndownloader/files/17284190)
Supplement: Supplementary file 1 [file 17284190]

## Sheet: Table S5 Functional annotation 
Supplemental Material, Table S5. Functional annotation clustering of autosomal upregulated genes in Smchd1-null mouse NPCs
Annotation Cluster 1	Enrichment Score: 6.394603069992633
Category	Term	Count	%	PValue	Genes	List Total	Pop Hits	Pop Total	Fold Enrichment	Bonferroni	Benjamini	FDR
UP_SEQ_FEATURE	chain:Protocadherin alpha-4	7	3.43137	1.25e-09	ENSMUSG00000103442, ENSMUSG00000103707, ENSMUSG00000104318, ENSMUSG00000104148, ENSMUSG00000103092, ENSMUSG00000104252, ENSMUSG00000007440	176	13	18012	55.1066	7.84e-07	3.92e-07	1.86e-06
UP_SEQ_FEATURE	repeat:PXXP 6	7	3.43137	1.25e-09	ENSMUSG00000103442, ENSMUSG00000103707, ENSMUSG00000104318, ENSMUSG00000104148, ENSMUSG00000103092, ENSMUSG00000104252, ENSMUSG00000007440	176	13	18012	55.1066	7.84e-07	3.92e-07	1.86e-06
UP_SEQ_FEATURE	repeat:PXXP 2	7	3.43137	1.25e-09	ENSMUSG00000103442, ENSMUSG00000103707, ENSMUSG00000104318, ENSMUSG00000104148, ENSMUSG00000103092, ENSMUSG00000104252, ENSMUSG00000007440	176	13	18012	55.1066	7.84e-07	3.92e-07	1.86e-06
UP_SEQ_FEATURE	repeat:PXXP 3	7	3.43137	1.25e-09	ENSMUSG00000103442, ENSMUSG00000103707, ENSMUSG00000104318, ENSMUSG00000104148, ENSMUSG00000103092, ENSMUSG00000104252, ENSMUSG00000007440	176	13	18012	55.1066	7.84e-07	3.92e-07	1.86e-06
UP_SEQ_FEATURE	repeat:PXXP 4	7	3.43137	1.25e-09	ENSMUSG00000103442, ENSMUSG00000103707, ENSMUSG00000104318, ENSMUSG00000104148, ENSMUSG00000103092, ENSMUSG00000104252, ENSMUSG00000007440	176	13	18012	55.1066	7.84e-07	3.92e-07	1.86e-06
UP_SEQ_FEATURE	repeat:PXXP 5	7	3.43137	1.25e-09	ENSMUSG00000103442, ENSMUSG00000103707, ENSMUSG00000104318, ENSMUSG00000104148, ENSMUSG00000103092, ENSMUSG00000104252, ENSMUSG00000007440	176	13	18012	55.1066	7.84e-07	3.92e-07	1.86e-06
UP_SEQ_FEATURE	repeat:PXXP 1	7	3.43137	1.25e-09	ENSMUSG00000103442, ENSMUSG00000103707, ENSMUSG00000104318, ENSMUSG00000104148, ENSMUSG00000103092, ENSMUSG00000104252, ENSMUSG00000007440	176	13	18012	55.1066	7.84e-07	3.92e-07	1.86e-06
UP_SEQ_FEATURE	region of interest:6 X 4 AA repeats of P-X-X-P	7	3.43137	1.25e-09	ENSMUSG00000103442, ENSMUSG00000103707, ENSMUSG00000104318, ENSMUSG00000104148, ENSMUSG00000103092, ENSMUSG00000104252, ENSMUSG00000007440	176	13	18012	55.1066	7.84e-07	3.92e-07	1.86e-06
INTERPRO	IPR013164:Cadherin, N-terminal	9	4.41176	1.68e-07	ENSMUSG00000102312, ENSMUSG00000103442, ENSMUSG00000103707, ENSMUSG00000104318, ENSMUSG00000104148, ENSMUSG00000103800, ENSMUSG00000103092, ENSMUSG00000104252, ENSMUSG00000007440	183	69	20594	14.6785	7.04e-05	1.41e-05	0.000236
UP_SEQ_FEATURE	domain:Cadherin 6	7	3.43137	3.05e-07	ENSMUSG00000103442, ENSMUSG00000103707, ENSMUSG00000104318, ENSMUSG00000104148, ENSMUSG00000103092, ENSMUSG00000104252, ENSMUSG00000007440	176	29	18012	24.703	0.000191	4.77e-05	0.000452
GOTERM_MF_DIRECT	GO:0005509~calcium ion binding	22	10.7843	1.4e-06	ENSMUSG00000102312, ENSMUSG00000103442, ENSMUSG00000103707, ENSMUSG00000044912, ENSMUSG00000029309, ENSMUSG00000027386, ENSMUSG00000007440, ENSMUSG00000052415, ENSMUSG00000031558, ENSMUSG00000028226, ENSMUSG00000022887, ENSMUSG00000035459, ENSMUSG00000104318, ENSMUSG00000104148, ENSMUSG00000003657, ENSMUSG00000021186, ENSMUSG00000038578, ENSMUSG00000032452, ENSMUSG00000103800, ENSMUSG00000103092,…	159	699	17446	3.45338	0.000428	0.000214	0.00187395
INTERPRO	IPR002126:Cadherin	10	4.90196	1.71e-06	ENSMUSG00000102312, ENSMUSG00000103442, ENSMUSG00000103707, ENSMUSG00000104318, ENSMUSG00000104148, ENSMUSG00000032452, ENSMUSG00000103800, ENSMUSG00000103092, ENSMUSG00000104252, ENSMUSG00000007440	183	125	20594	9.00284	0.000715	0.000102	0.00240146
UP_SEQ_FEATURE	domain:Cadherin 2	8	3.92157	1.81e-06	ENSMUSG00000103442, ENSMUSG00000103707, ENSMUSG00000104318, ENSMUSG00000104148, ENSMUSG00000032452, ENSMUSG00000103092, ENSMUSG00000104252, ENSMUSG00000007440	176	60	18012	13.6455	0.00113485	0.000189	0.00269448
UP_SEQ_FEATURE	domain:Cadherin 1	8	3.92157	1.81e-06	ENSMUSG00000103442, ENSMUSG00000103707, ENSMUSG00000104318, ENSMUSG00000104148, ENSMUSG00000032452, ENSMUSG00000103092, ENSMUSG00000104252, ENSMUSG00000007440	176	60	18012	13.6455	0.00113485	0.000189	0.00269448
INTERPRO	IPR015919:Cadherin-like	10	4.90196	1.95e-06	ENSMUSG00000102312, ENSMUSG00000103442, ENSMUSG00000103707, ENSMUSG00000104318, ENSMUSG00000104148, ENSMUSG00000032452, ENSMUSG00000103800, ENSMUSG00000103092, ENSMUSG00000104252, ENSMUSG00000007440	183	127	20594	8.86106	0.000816	0.000102	0.00274168
UP_SEQ_FEATURE	domain:Cadherin 5	7	3.43137	7.63e-06	ENSMUSG00000103442, ENSMUSG00000103707, ENSMUSG00000104318, ENSMUSG00000104148, ENSMUSG00000103092, ENSMUSG00000104252, ENSMUSG00000007440	176	49	18012	14.6201	0.00476775	0.000597	0.0113403
INTERPRO	IPR020894:Cadherin conserved site	9	4.41176	8.43e-06	ENSMUSG00000102312, ENSMUSG00000103442, ENSMUSG00000103707, ENSMUSG00000104318, ENSMUSG00000104148, ENSMUSG00000103800, ENSMUSG00000103092, ENSMUSG00000104252, ENSMUSG00000007440	183	115	20594	8.80713	0.00351908	0.000392	0.011838
SMART	SM00112:CA	10	4.90196	1.5e-05	ENSMUSG00000102312, ENSMUSG00000103442, ENSMUSG00000103707, ENSMUSG00000104318, ENSMUSG00000104148, ENSMUSG00000032452, ENSMUSG00000103800, ENSMUSG00000103092, ENSMUSG00000104252, ENSMUSG00000007440	124	124	10425	6.78005	0.00157332	0.000787	0.0167957
UP_SEQ_FEATURE	domain:Cadherin 4	7	3.43137	1.68e-05	ENSMUSG00000103442, ENSMUSG00000103707, ENSMUSG00000104318, ENSMUSG00000104148, ENSMUSG00000103092, ENSMUSG00000104252, ENSMUSG00000007440	176	56	18012	12.7926	0.0104352	0.00116488	0.0248897
UP_SEQ_FEATURE	domain:Cadherin 3	7	3.43137	1.86e-05	ENSMUSG00000103442, ENSMUSG00000103707, ENSMUSG00000104318, ENSMUSG00000104148, ENSMUSG00000103092, ENSMUSG00000104252, ENSMUSG00000007440	176	57	18012	12.5682	0.0115631	0.00116237	0.0275952
GOTERM_BP_DIRECT	GO:0007156~homophilic cell adhesion via plasma membrane adhesion molecules	10	4.90196	2.64e-05	ENSMUSG00000102312, ENSMUSG00000103442, ENSMUSG00000103707, ENSMUSG00000104318, ENSMUSG00000104148, ENSMUSG00000032452, ENSMUSG00000103800, ENSMUSG00000103092, ENSMUSG00000104252, ENSMUSG00000007440	173	163	18082	6.41228	0.0313041	0.00528673	0.042683
UP_KEYWORDS	Calcium	21	10.2941	3.72e-05	ENSMUSG00000102312, ENSMUSG00000103442, ENSMUSG00000103707, ENSMUSG00000029309, ENSMUSG00000027386, ENSMUSG00000032377, ENSMUSG00000007440, ENSMUSG00000052415, ENSMUSG00000028226, ENSMUSG00000022887, ENSMUSG00000104318, ENSMUSG00000104148, ENSMUSG00000003657, ENSMUSG00000021186, ENSMUSG00000038578, ENSMUSG00000032452, ENSMUSG00000036103, ENSMUSG00000103800, ENSMUSG00000103092, ENSMUSG00000059991,…	198	827	22680	2.90865	0.00734195	0.00147272	0.0465605
UP_KEYWORDS	Cell adhesion	14	6.86275	0.0002	ENSMUSG00000103442, ENSMUSG00000102312, ENSMUSG00000103707, ENSMUSG00000027386, ENSMUSG00000039546, ENSMUSG00000007440, ENSMUSG00000104318, ENSMUSG00000021186, ENSMUSG00000104148, ENSMUSG00000032452, ENSMUSG00000103092, ENSMUSG00000103800, ENSMUSG00000104252, ENSMUSG00000064293	198	459	22680	3.49376	0.0388486	0.00658213	0.250101
UP_SEQ_FEATURE	compositionally biased region:Poly-Lys	8	3.92157	0.00120451	ENSMUSG00000103442, ENSMUSG00000044072, ENSMUSG00000103707, ENSMUSG00000104318, ENSMUSG00000104148, ENSMUSG00000103092, ENSMUSG00000104252, ENSMUSG00000007440	176	166	18012	4.93209	0.529745	0.0609376	1.77445
Annotation Cluster 2	Enrichment Score: 5.403791348450986
Category	Term	Count	%	PValue	Genes	List Total	Pop Hits	Pop Total	Fold Enrichment	Bonferroni	Benjamini	FDR
INTERPRO	IPR020479:Homeodomain, metazoa	15	7.35294	6.32e-14	ENSMUSG00000038692, ENSMUSG00000021381, ENSMUSG00000048763, ENSMUSG00000022485, ENSMUSG00000075588, ENSMUSG00000020875, ENSMUSG00000075394, ENSMUSG00000034777, ENSMUSG00000043342, ENSMUSG00000049691, ENSMUSG00000034384, ENSMUSG00000079277, ENSMUSG00000023391, ENSMUSG00000038227, ENSMUSG00000000938	183	91	20594	18.5498	2.64e-11	2.64e-11	8.87e-11
INTERPRO	IPR017970:Homeobox, conserved site	16	7.84314	9.54e-11	ENSMUSG00000038692, ENSMUSG00000021381, ENSMUSG00000048763, ENSMUSG00000022485, ENSMUSG00000075588, ENSMUSG00000020875, ENSMUSG00000075394, ENSMUSG00000034777, ENSMUSG00000043342, ENSMUSG00000049691, ENSMUSG00000034384, ENSMUSG00000079277, ENSMUSG00000023391, ENSMUSG00000038227, ENSMUSG00000000938, ENSMUSG00000021095	183	184	20594	9.7857	3.99e-08	1.99e-08	1.34e-07
UP_SEQ_FEATURE	DNA-binding region:Homeobox	16	7.84314	2.51e-10	ENSMUSG00000038692, ENSMUSG00000021381, ENSMUSG00000048763, ENSMUSG00000022485, ENSMUSG00000075588, ENSMUSG00000020875, ENSMUSG00000075394, ENSMUSG00000034777, ENSMUSG00000043342, ENSMUSG00000049691, ENSMUSG00000034384, ENSMUSG00000079277, ENSMUSG00000023391, ENSMUSG00000038227, ENSMUSG00000000938, ENSMUSG00000021095	176	180	18012	9.09697	1.57e-07	1.57e-07	3.72e-07
UP_KEYWORDS	Developmental protein	31	15.1961	1.72e-09	ENSMUSG00000038692, ENSMUSG00000003227, ENSMUSG00000024247, ENSMUSG00000046714, ENSMUSG00000037034, ENSMUSG00000075588, ENSMUSG00000075394, ENSMUSG00000038793, ENSMUSG00000028780, ENSMUSG00000043342, ENSMUSG00000034384, ENSMUSG00000023391, ENSMUSG00000024905, ENSMUSG00000034161, ENSMUSG00000081683, ENSMUSG00000021217, ENSMUSG00000021095, ENSMUSG00000031965, ENSMUSG00000048763, ENSMUSG00000028354,…	198	976	22680	3.63823	3.41e-07	3.41e-07	2.16e-06
INTERPRO	IPR001356:Homeodomain	17	8.33333	2.6e-09	ENSMUSG00000038692, ENSMUSG00000021381, ENSMUSG00000048763, ENSMUSG00000022485, ENSMUSG00000075588, ENSMUSG00000020875, ENSMUSG00000075394, ENSMUSG00000034777, ENSMUSG00000043342, ENSMUSG00000049691, ENSMUSG00000034384, ENSMUSG00000079277, ENSMUSG00000023391, ENSMUSG00000038227, ENSMUSG00000000938, ENSMUSG00000021217, ENSMUSG00000021095	183	271	20594	7.05942	1.08e-06	3.62e-07	3.64e-06
UP_KEYWORDS	Homeobox	17	8.33333	3.38e-09	ENSMUSG00000038692, ENSMUSG00000021381, ENSMUSG00000048763, ENSMUSG00000022485, ENSMUSG00000075588, ENSMUSG00000020875, ENSMUSG00000075394, ENSMUSG00000034777, ENSMUSG00000043342, ENSMUSG00000049691, ENSMUSG00000034384, ENSMUSG00000079277, ENSMUSG00000023391, ENSMUSG00000038227, ENSMUSG00000000938, ENSMUSG00000021217, ENSMUSG00000021095	198	280	22680	6.95455	6.7e-07	3.35e-07	4.23e-06
GOTERM_BP_DIRECT	GO:0009952~anterior/posterior pattern specification	12	5.88235	9.57e-09	ENSMUSG00000038692, ENSMUSG00000021381, ENSMUSG00000043342, ENSMUSG00000048763, ENSMUSG00000079277, ENSMUSG00000022485, ENSMUSG00000024713, ENSMUSG00000038227, ENSMUSG00000075588, ENSMUSG00000020875, ENSMUSG00000000938, ENSMUSG00000075394	173	112	18082	11.1986	1.15e-05	5.77e-06	1.55e-05
INTERPRO	IPR009057:Homeodomain-like	18	8.82353	1.22e-08	ENSMUSG00000038692, ENSMUSG00000021381, ENSMUSG00000048763, ENSMUSG00000022485, ENSMUSG00000037034, ENSMUSG00000075588, ENSMUSG00000020875, ENSMUSG00000075394, ENSMUSG00000034777, ENSMUSG00000043342, ENSMUSG00000049691, ENSMUSG00000034384, ENSMUSG00000079277, ENSMUSG00000023391, ENSMUSG00000038227, ENSMUSG00000000938, ENSMUSG00000021217, ENSMUSG00000021095	183	345	20594	5.87142	5.09e-06	1.27e-06	1.71e-05
GOTERM_BP_DIRECT	GO:0007275~multicellular organism development	31	15.1961	3.67e-08	ENSMUSG00000038692, ENSMUSG00000003227, ENSMUSG00000024247, ENSMUSG00000046714, ENSMUSG00000037034, ENSMUSG00000075588, ENSMUSG00000075394, ENSMUSG00000038793, ENSMUSG00000028780, ENSMUSG00000043342, ENSMUSG00000034384, ENSMUSG00000023391, ENSMUSG00000024905, ENSMUSG00000034161, ENSMUSG00000081683, ENSMUSG00000021217, ENSMUSG00000021095, ENSMUSG00000031965, ENSMUSG00000048763, ENSMUSG00000028354,…	173	1029	18082	3.14881	4.42e-05	1.47e-05	5.94e-05
SMART	SM00389:HOX	17	8.33333	8.44e-08	ENSMUSG00000038692, ENSMUSG00000021381, ENSMUSG00000048763, ENSMUSG00000022485, ENSMUSG00000075588, ENSMUSG00000020875, ENSMUSG00000075394, ENSMUSG00000034777, ENSMUSG00000043342, ENSMUSG00000049691, ENSMUSG00000034384, ENSMUSG00000079277, ENSMUSG00000023391, ENSMUSG00000038227, ENSMUSG00000000938, ENSMUSG00000021217, ENSMUSG00000021095	124	266	10425	5.37306	8.87e-06	8.87e-06	9.46e-05
GOTERM_MF_DIRECT	GO:0043565~sequence-specific DNA binding	22	10.7843	2.81e-07	ENSMUSG00000038692, ENSMUSG00000021381, ENSMUSG00000048763, ENSMUSG00000022485, ENSMUSG00000003949, ENSMUSG00000046714, ENSMUSG00000075588, ENSMUSG00000020875, ENSMUSG00000075394, ENSMUSG00000015619, ENSMUSG00000015053, ENSMUSG00000034777, ENSMUSG00000043342, ENSMUSG00000049691, ENSMUSG00000079277, ENSMUSG00000034384, ENSMUSG00000023391, ENSMUSG00000038227, ENSMUSG00000034161, ENSMUSG00000000938,…	159	633	17446	3.81345	8.58e-05	8.58e-05	0.000376
INTERPRO	IPR001827:Homeobox protein, antennapedia type, conserved site	6	2.94118	7.1e-07	ENSMUSG00000038692, ENSMUSG00000048763, ENSMUSG00000079277, ENSMUSG00000022485, ENSMUSG00000075588, ENSMUSG00000075394	183	20	20594	33.7607	0.000297	4.95e-05	0.000997
GOTERM_BP_DIRECT	GO:0048704~embryonic skeletal system morphogenesis	8	3.92157	8.62e-07	ENSMUSG00000038692, ENSMUSG00000021835, ENSMUSG00000043342, ENSMUSG00000048763, ENSMUSG00000079277, ENSMUSG00000046714, ENSMUSG00000075588, ENSMUSG00000021095	173	55	18082	15.2029	0.00103758	0.000259	0.00139349
UP_SEQ_FEATURE	short sequence motif:Antp-type hexapeptide	6	2.94118	2.99e-06	ENSMUSG00000038692, ENSMUSG00000048763, ENSMUSG00000079277, ENSMUSG00000022485, ENSMUSG00000075588, ENSMUSG00000075394	176	24	18012	25.5852	0.0018712	0.000268	0.00444441
UP_KEYWORDS	DNA-binding	28	13.7255	0.000723	ENSMUSG00000038692, ENSMUSG00000021381, ENSMUSG00000033585, ENSMUSG00000046714, ENSMUSG00000003949, ENSMUSG00000037034, ENSMUSG00000075588, ENSMUSG00000015619, ENSMUSG00000075394, ENSMUSG00000015053, ENSMUSG00000043342, ENSMUSG00000049691, ENSMUSG00000034384, ENSMUSG00000023391, ENSMUSG00000034161, ENSMUSG00000021944, ENSMUSG00000021217, ENSMUSG00000021095, ENSMUSG00000031965, ENSMUSG00000048763,…	198	1604	22680	1.99955	0.133381	0.0202432	0.900648
UP_KEYWORDS	Transcription regulation	30	14.7059	0.0009	ENSMUSG00000038692, ENSMUSG00000021381, ENSMUSG00000033585, ENSMUSG00000046714, ENSMUSG00000003949, ENSMUSG00000037034, ENSMUSG00000075588, ENSMUSG00000015619, ENSMUSG00000075394, ENSMUSG00000015053, ENSMUSG00000043342, ENSMUSG00000049691, ENSMUSG00000048387, ENSMUSG00000034384, ENSMUSG00000034161, ENSMUSG00000021944, ENSMUSG00000021217, ENSMUSG00000031965, ENSMUSG00000048763, ENSMUSG00000010461,…	198	1799	22680	1.91015	0.163312	0.0220415	1.12053
GOTERM_MF_DIRECT	GO:0003700~transcription factor activity, sequence-specific DNA binding	19	9.31373	0.00108149	ENSMUSG00000038692, ENSMUSG00000031965, ENSMUSG00000048763, ENSMUSG00000022485, ENSMUSG00000003949, ENSMUSG00000046714, ENSMUSG00000037034, ENSMUSG00000075588, ENSMUSG00000049164, ENSMUSG00000075394, ENSMUSG00000015619, ENSMUSG00000015053, ENSMUSG00000034777, ENSMUSG00000043342, ENSMUSG00000079277, ENSMUSG00000034384, ENSMUSG00000070632, ENSMUSG00000021944, ENSMUSG00000061524	159	883	17446	2.36098	0.281876	0.0794449	1.43987
GOTERM_MF_DIRECT	GO:0003677~DNA binding	31	15.1961	0.00108612	ENSMUSG00000038692, ENSMUSG00000021381, ENSMUSG00000033585, ENSMUSG00000046714, ENSMUSG00000003949, ENSMUSG00000037034, ENSMUSG00000075588, ENSMUSG00000022432, ENSMUSG00000015619, ENSMUSG00000075394, ENSMUSG00000015053, ENSMUSG00000020287, ENSMUSG00000043342, ENSMUSG00000049691, ENSMUSG00000034384, ENSMUSG00000023391, ENSMUSG00000034161, ENSMUSG00000021944, ENSMUSG00000021217, ENSMUSG00000021095,…	159	1847	17446	1.84159	0.282895	0.0643432	1.446
UP_KEYWORDS	Transcription	30	14.7059	0.00149021	ENSMUSG00000038692, ENSMUSG00000021381, ENSMUSG00000033585, ENSMUSG00000046714, ENSMUSG00000003949, ENSMUSG00000037034, ENSMUSG00000075588, ENSMUSG00000015619, ENSMUSG00000075394, ENSMUSG00000015053, ENSMUSG00000043342, ENSMUSG00000049691, ENSMUSG00000048387, ENSMUSG00000034384, ENSMUSG00000034161, ENSMUSG00000021944, ENSMUSG00000021217, ENSMUSG00000031965, ENSMUSG00000048763, ENSMUSG00000010461,…	198	1859	22680	1.8485	0.255678	0.0290965	1.84884
GOTERM_BP_DIRECT	GO:0006351~transcription, DNA-templated	30	14.7059	0.00628426	ENSMUSG00000038692, ENSMUSG00000021381, ENSMUSG00000033585, ENSMUSG00000046714, ENSMUSG00000003949, ENSMUSG00000037034, ENSMUSG00000075588, ENSMUSG00000015619, ENSMUSG00000075394, ENSMUSG00000015053, ENSMUSG00000043342, ENSMUSG00000049691, ENSMUSG00000048387, ENSMUSG00000034384, ENSMUSG00000034161, ENSMUSG00000021944, ENSMUSG00000021217, ENSMUSG00000031965, ENSMUSG00000048763, ENSMUSG00000010461,…	173	1885	18082	1.66345	0.999498	0.291986	9.69424
INTERPRO	IPR017995:Homeobox protein, antennapedia type	3	1.47059	0.00659158	ENSMUSG00000038692, ENSMUSG00000022485, ENSMUSG00000075394	183	14	20594	24.1148	0.936986	0.179185	8.8656
GOTERM_BP_DIRECT	GO:0000122~negative regulation of transcription from RNA polymerase II promoter	15	7.35294	0.00995273	ENSMUSG00000038692, ENSMUSG00000031965, ENSMUSG00000048763, ENSMUSG00000046714, ENSMUSG00000015619, ENSMUSG00000015053, ENSMUSG00000038793, ENSMUSG00000034777, ENSMUSG00000021835, ENSMUSG00000004698, ENSMUSG00000043342, ENSMUSG00000049691, ENSMUSG00000048387, ENSMUSG00000023391, ENSMUSG00000021095	173	729	18082	2.15062	0.999994	0.38253	14.9382
GOTERM_BP_DIRECT	GO:0045944~positive regulation of transcription from RNA polymerase II promoter	18	8.82353	0.0140381	ENSMUSG00000038692, ENSMUSG00000031965, ENSMUSG00000033585, ENSMUSG00000046714, ENSMUSG00000037034, ENSMUSG00000020875, ENSMUSG00000015619, ENSMUSG00000015053, ENSMUSG00000021835, ENSMUSG00000043342, ENSMUSG00000048387, ENSMUSG00000034384, ENSMUSG00000023391, ENSMUSG00000034161, ENSMUSG00000000938, ENSMUSG00000021944, ENSMUSG00000029361, ENSMUSG00000061524	173	995	18082	1.89082	1	0.444253	20.4414
GOTERM_BP_DIRECT	GO:0006355~regulation of transcription, DNA-templated	32	15.6863	0.0248423	ENSMUSG00000038692, ENSMUSG00000021381, ENSMUSG00000033585, ENSMUSG00000046714, ENSMUSG00000003949, ENSMUSG00000037034, ENSMUSG00000075588, ENSMUSG00000015619, ENSMUSG00000075394, ENSMUSG00000015053, ENSMUSG00000043342, ENSMUSG00000049691, ENSMUSG00000048387, ENSMUSG00000034384, ENSMUSG00000023391, ENSMUSG00000034161, ENSMUSG00000021944, ENSMUSG00000021217, ENSMUSG00000021095, ENSMUSG00000031965,…	173	2279	18082	1.46759	1	0.589985	33.429
UP_KEYWORDS	Nucleus	52	25.4902	0.0259415	ENSMUSG00000038692, ENSMUSG00000033585, ENSMUSG00000003949, ENSMUSG00000046714, ENSMUSG00000022432, ENSMUSG00000075588, ENSMUSG00000015619, ENSMUSG00000015053, ENSMUSG00000034384, ENSMUSG00000048387, ENSMUSG00000023391, ENSMUSG00000070632, ENSMUSG00000059810, ENSMUSG00000021217, ENSMUSG00000028789, ENSMUSG00000031965, ENSMUSG00000048763, ENSMUSG00000010461, ENSMUSG00000049164, ENSMUSG00000020875,…	198	4534	22680	1.31371	0.994507	0.310459	28.0284
GOTERM_CC_DIRECT	GO:0005634~nucleus	62	30.3922	0.175992	ENSMUSG00000038692, ENSMUSG00000037628, ENSMUSG00000033585, ENSMUSG00000046714, ENSMUSG00000003949, ENSMUSG00000022432, ENSMUSG00000075588, ENSMUSG00000015619, ENSMUSG00000015053, ENSMUSG00000048387, ENSMUSG00000034384, ENSMUSG00000023391, ENSMUSG00000104148, ENSMUSG00000070632, ENSMUSG00000059810, ENSMUSG00000021217, ENSMUSG00000028789, ENSMUSG00000031965, ENSMUSG00000048763, ENSMUSG00000010461,…	180	6019	19662	1.12518	1	0.907283	90.6167
Annotation Cluster 3	Enrichment Score: 4.78309563640274
Category	Term	Count	%	PValue	Genes	List Total	Pop Hits	Pop Total	Fold Enrichment	Bonferroni	Benjamini	FDR
UP_SEQ_FEATURE	signal peptide	59	28.9216	2.73e-07	ENSMUSG00000003227, ENSMUSG00000103707, ENSMUSG00000027419, ENSMUSG00000048304, ENSMUSG00000027386, ENSMUSG00000061353, ENSMUSG00000078452, ENSMUSG00000007440, ENSMUSG00000038793, ENSMUSG00000022594, ENSMUSG00000022887, ENSMUSG00000028780, ENSMUSG00000104148, ENSMUSG00000039883, ENSMUSG00000033676, ENSMUSG00000042035, ENSMUSG00000073421, ENSMUSG00000103442, ENSMUSG00000000627, ENSMUSG00000029999,…	176	3124	18012	1.93281	0.000171	5.7e-05	0.000406
UP_SEQ_FEATURE	glycosylation site:N-linked (GlcNAc...)	63	30.8824	8.82e-07	ENSMUSG00000003227, ENSMUSG00000103707, ENSMUSG00000027419, ENSMUSG00000048304, ENSMUSG00000027386, ENSMUSG00000034435, ENSMUSG00000078452, ENSMUSG00000027015, ENSMUSG00000007440, ENSMUSG00000038793, ENSMUSG00000022887, ENSMUSG00000028780, ENSMUSG00000104148, ENSMUSG00000060988, ENSMUSG00000033676, ENSMUSG00000036103, ENSMUSG00000042035, ENSMUSG00000073421, ENSMUSG00000103442, ENSMUSG00000050822,…	176	3563	18012	1.80956	0.000552	0.00011	0.00131024
UP_KEYWORDS	Glycoprotein	60	29.4118	3.34e-06	ENSMUSG00000003227, ENSMUSG00000027419, ENSMUSG00000048304, ENSMUSG00000027386, ENSMUSG00000034435, ENSMUSG00000078452, ENSMUSG00000027015, ENSMUSG00000007440, ENSMUSG00000038793, ENSMUSG00000022594, ENSMUSG00000022887, ENSMUSG00000028780, ENSMUSG00000060988, ENSMUSG00000033676, ENSMUSG00000036103, ENSMUSG00000042035, ENSMUSG00000073421, ENSMUSG00000050822, ENSMUSG00000000627, ENSMUSG00000029999,…	198	3815	22680	1.8015	0.000662	0.000221	0.0041825
UP_KEYWORDS	Signal	67	32.8431	5.93e-06	ENSMUSG00000027419, ENSMUSG00000003227, ENSMUSG00000103707, ENSMUSG00000048304, ENSMUSG00000027386, ENSMUSG00000061353, ENSMUSG00000078452, ENSMUSG00000007440, ENSMUSG00000022594, ENSMUSG00000038793, ENSMUSG00000022887, ENSMUSG00000028780, ENSMUSG00000030022, ENSMUSG00000104148, ENSMUSG00000039883, ENSMUSG00000033676, ENSMUSG00000103800, ENSMUSG00000042035, ENSMUSG00000073421, ENSMUSG00000103442,…	198	4543	22680	1.68931	0.00117359	0.000294	0.00742103
UP_KEYWORDS	Disulfide bond	44	21.5686	0.00130531	ENSMUSG00000030525, ENSMUSG00000027419, ENSMUSG00000003227, ENSMUSG00000027386, ENSMUSG00000061353, ENSMUSG00000022146, ENSMUSG00000078452, ENSMUSG00000060550, ENSMUSG00000027082, ENSMUSG00000038793, ENSMUSG00000022594, ENSMUSG00000028226, ENSMUSG00000042198, ENSMUSG00000028780, ENSMUSG00000022887, ENSMUSG00000020357, ENSMUSG00000035459, ENSMUSG00000030022, ENSMUSG00000059498, ENSMUSG00000021186,…	198	3124	22680	1.61332	0.227884	0.0283267	1.62116
UP_SEQ_FEATURE	disulfide bond	39	19.1176	0.00320914	ENSMUSG00000030525, ENSMUSG00000003227, ENSMUSG00000027419, ENSMUSG00000027386, ENSMUSG00000061353, ENSMUSG00000022146, ENSMUSG00000078452, ENSMUSG00000060550, ENSMUSG00000027082, ENSMUSG00000038793, ENSMUSG00000022594, ENSMUSG00000028226, ENSMUSG00000028780, ENSMUSG00000022887, ENSMUSG00000035459, ENSMUSG00000020357, ENSMUSG00000059498, ENSMUSG00000021186, ENSMUSG00000060988, ENSMUSG00000081683,…	176	2510	18012	1.59016	0.8663	0.125536	4.66264
Annotation Cluster 4	Enrichment Score: 2.570457291879938
Category	Term	Count	%	PValue	Genes	List Total	Pop Hits	Pop Total	Fold Enrichment	Bonferroni	Benjamini	FDR
UP_SEQ_FEATURE	signal peptide	59	28.9216	2.73e-07	ENSMUSG00000003227, ENSMUSG00000103707, ENSMUSG00000027419, ENSMUSG00000048304, ENSMUSG00000027386, ENSMUSG00000061353, ENSMUSG00000078452, ENSMUSG00000007440, ENSMUSG00000038793, ENSMUSG00000022594, ENSMUSG00000022887, ENSMUSG00000028780, ENSMUSG00000104148, ENSMUSG00000039883, ENSMUSG00000033676, ENSMUSG00000042035, ENSMUSG00000073421, ENSMUSG00000103442, ENSMUSG00000000627, ENSMUSG00000029999,…	176	3124	18012	1.93281	0.000171	5.7e-05	0.000406
UP_SEQ_FEATURE	glycosylation site:N-linked (GlcNAc...)	63	30.8824	8.82e-07	ENSMUSG00000003227, ENSMUSG00000103707, ENSMUSG00000027419, ENSMUSG00000048304, ENSMUSG00000027386, ENSMUSG00000034435, ENSMUSG00000078452, ENSMUSG00000027015, ENSMUSG00000007440, ENSMUSG00000038793, ENSMUSG00000022887, ENSMUSG00000028780, ENSMUSG00000104148, ENSMUSG00000060988, ENSMUSG00000033676, ENSMUSG00000036103, ENSMUSG00000042035, ENSMUSG00000073421, ENSMUSG00000103442, ENSMUSG00000050822,…	176	3563	18012	1.80956	0.000552	0.00011	0.00131024
UP_SEQ_FEATURE	topological domain:Extracellular	42	20.5882	4.62e-05	ENSMUSG00000030525, ENSMUSG00000041907, ENSMUSG00000103707, ENSMUSG00000003227, ENSMUSG00000048304, ENSMUSG00000037762, ENSMUSG00000030255, ENSMUSG00000032377, ENSMUSG00000022146, ENSMUSG00000060550, ENSMUSG00000007440, ENSMUSG00000028226, ENSMUSG00000020357, ENSMUSG00000035459, ENSMUSG00000059498, ENSMUSG00000104148, ENSMUSG00000081683, ENSMUSG00000029211, ENSMUSG00000033676, ENSMUSG00000067235,…	176	2256	18012	1.90528	0.0285204	0.002627	0.0686391
UP_SEQ_FEATURE	topological domain:Cytoplasmic	44	21.5686	0.00211967	ENSMUSG00000030525, ENSMUSG00000041907, ENSMUSG00000103707, ENSMUSG00000003227, ENSMUSG00000048304, ENSMUSG00000037762, ENSMUSG00000030255, ENSMUSG00000032377, ENSMUSG00000022146, ENSMUSG00000056296, ENSMUSG00000007440, ENSMUSG00000028226, ENSMUSG00000020357, ENSMUSG00000035459, ENSMUSG00000059498, ENSMUSG00000104148, ENSMUSG00000060988, ENSMUSG00000081683, ENSMUSG00000029211, ENSMUSG00000033676,…	176	2880	18012	1.56354	0.735078	0.0905179	3.10294
GOTERM_CC_DIRECT	GO:0005886~plasma membrane	61	29.902	0.00524322	ENSMUSG00000042659, ENSMUSG00000044912, ENSMUSG00000003227, ENSMUSG00000103707, ENSMUSG00000030255, ENSMUSG00000037762, ENSMUSG00000034435, ENSMUSG00000061353, ENSMUSG00000078452, ENSMUSG00000007440, ENSMUSG00000022594, ENSMUSG00000015653, ENSMUSG00000104148, ENSMUSG00000033676, ENSMUSG00000103800, ENSMUSG00000042035, ENSMUSG00000059810, ENSMUSG00000073421, ENSMUSG00000029851, ENSMUSG00000103442,…	180	4874	19662	1.3671	0.595137	0.363711	6.224
UP_SEQ_FEATURE	transmembrane region	58	28.4314	0.00575561	ENSMUSG00000003227, ENSMUSG00000103707, ENSMUSG00000048304, ENSMUSG00000030255, ENSMUSG00000037762, ENSMUSG00000034435, ENSMUSG00000029330, ENSMUSG00000027015, ENSMUSG00000007440, ENSMUSG00000015653, ENSMUSG00000104148, ENSMUSG00000060988, ENSMUSG00000033676, ENSMUSG00000036103, ENSMUSG00000042035, ENSMUSG00000073421, ENSMUSG00000103442, ENSMUSG00000050822, ENSMUSG00000000627, ENSMUSG00000029999,…	176	4312	18012	1.37657	0.973041	0.202153	8.21731
UP_KEYWORDS	Cell membrane	45	22.0588	0.0213132	ENSMUSG00000042659, ENSMUSG00000030525, ENSMUSG00000041907, ENSMUSG00000103707, ENSMUSG00000034435, ENSMUSG00000030255, ENSMUSG00000037762, ENSMUSG00000078452, ENSMUSG00000007440, ENSMUSG00000022594, ENSMUSG00000015653, ENSMUSG00000028226, ENSMUSG00000020357, ENSMUSG00000035459, ENSMUSG00000059498, ENSMUSG00000104148, ENSMUSG00000081683, ENSMUSG00000029211, ENSMUSG00000033676, ENSMUSG00000103800,…	198	3759	22680	1.37125	0.985957	0.279727	23.6302
GOTERM_CC_DIRECT	GO:0016020~membrane	77	37.7451	0.0333362	ENSMUSG00000042659, ENSMUSG00000027419, ENSMUSG00000003227, ENSMUSG00000103707, ENSMUSG00000048304, ENSMUSG00000034435, ENSMUSG00000037762, ENSMUSG00000030255, ENSMUSG00000029330, ENSMUSG00000078452, ENSMUSG00000027015, ENSMUSG00000007440, ENSMUSG00000022594, ENSMUSG00000015653, ENSMUSG00000060988, ENSMUSG00000033676, ENSMUSG00000036103, ENSMUSG00000103800, ENSMUSG00000042035, ENSMUSG00000059810,…	180	6998	19662	1.20191	0.997067	0.621647	33.9294
UP_KEYWORDS	Transmembrane helix	70	34.3137	0.101433	ENSMUSG00000027419, ENSMUSG00000003227, ENSMUSG00000103707, ENSMUSG00000048304, ENSMUSG00000034435, ENSMUSG00000037762, ENSMUSG00000030255, ENSMUSG00000029330, ENSMUSG00000027015, ENSMUSG00000007440, ENSMUSG00000015653, ENSMUSG00000104148, ENSMUSG00000060988, ENSMUSG00000033676, ENSMUSG00000036103, ENSMUSG00000103800, ENSMUSG00000042035, ENSMUSG00000073421, ENSMUSG00000103442, ENSMUSG00000102312,…	198	6938	22680	1.15569	1	0.601774	73.7722
UP_KEYWORDS	Transmembrane	70	34.3137	0.105614	ENSMUSG00000027419, ENSMUSG00000003227, ENSMUSG00000103707, ENSMUSG00000048304, ENSMUSG00000034435, ENSMUSG00000037762, ENSMUSG00000030255, ENSMUSG00000029330, ENSMUSG00000027015, ENSMUSG00000007440, ENSMUSG00000015653, ENSMUSG00000104148, ENSMUSG00000060988, ENSMUSG00000033676, ENSMUSG00000036103, ENSMUSG00000103800, ENSMUSG00000042035, ENSMUSG00000073421, ENSMUSG00000103442, ENSMUSG00000102312,…	198	6955	22680	1.15287	1	0.586877	75.2589
UP_KEYWORDS	Membrane	84	41.1765	0.148769	ENSMUSG00000042659, ENSMUSG00000027419, ENSMUSG00000003227, ENSMUSG00000103707, ENSMUSG00000048304, ENSMUSG00000034435, ENSMUSG00000037762, ENSMUSG00000030255, ENSMUSG00000029330, ENSMUSG00000078452, ENSMUSG00000027015, ENSMUSG00000007440, ENSMUSG00000022594, ENSMUSG00000015653, ENSMUSG00000104148, ENSMUSG00000060988, ENSMUSG00000033676, ENSMUSG00000036103, ENSMUSG00000103800, ENSMUSG00000042035,…	198	8683	22680	1.10812	1	0.66704	86.6753
GOTERM_CC_DIRECT	GO:0016021~integral component of membrane	70	34.3137	0.176845	ENSMUSG00000044912, ENSMUSG00000027419, ENSMUSG00000003227, ENSMUSG00000103707, ENSMUSG00000048304, ENSMUSG00000034435, ENSMUSG00000030255, ENSMUSG00000037762, ENSMUSG00000029330, ENSMUSG00000027015, ENSMUSG00000007440, ENSMUSG00000015653, ENSMUSG00000104148, ENSMUSG00000060988, ENSMUSG00000033676, ENSMUSG00000036103, ENSMUSG00000103800, ENSMUSG00000042035, ENSMUSG00000073421, ENSMUSG00000103442,…	180	6878	19662	1.11171	1	0.892637	90.7349
Annotation Cluster 5	Enrichment Score: 1.8607839058741173
Category	Term	Count	%	PValue	Genes	List Total	Pop Hits	Pop Total	Fold Enrichment	Bonferroni	Benjamini	FDR
GOTERM_BP_DIRECT	GO:0007399~nervous system development	12	5.88235	0.00099	ENSMUSG00000028780, ENSMUSG00000004698, ENSMUSG00000027419, ENSMUSG00000034384, ENSMUSG00000000627, ENSMUSG00000015619, ENSMUSG00000027313, ENSMUSG00000064293, ENSMUSG00000056486, ENSMUSG00000063919, ENSMUSG00000031558, ENSMUSG00000061524	173	377	18082	3.3269	0.697016	0.0947156	1.59006
KEGG_PATHWAY	mmu04360:Axon guidance	6	2.94118	0.00315653	ENSMUSG00000028780, ENSMUSG00000029869, ENSMUSG00000000627, ENSMUSG00000061353, ENSMUSG00000059810, ENSMUSG00000031558	61	129	7720	5.88639	0.328574	0.180594	3.59504
GOTERM_MF_DIRECT	GO:0045499~chemorepellent activity	3	1.47059	0.0246678	ENSMUSG00000028780, ENSMUSG00000000627, ENSMUSG00000031558	159	27	17446	12.1915	0.999521	0.534341	28.4503
GOTERM_BP_DIRECT	GO:0050919~negative chemotaxis	3	1.47059	0.0251749	ENSMUSG00000028780, ENSMUSG00000000627, ENSMUSG00000031558	173	26	18082	12.06	1	0.584317	33.7953
GOTERM_BP_DIRECT	GO:0007411~axon guidance	5	2.45098	0.0542119	ENSMUSG00000028780, ENSMUSG00000000627, ENSMUSG00000015619, ENSMUSG00000064293, ENSMUSG00000031558	173	149	18082	3.50739	1	0.753212	59.4058
UP_KEYWORDS	Neurogenesis	6	2.94118	0.0650225	ENSMUSG00000028780, ENSMUSG00000000627, ENSMUSG00000027313, ENSMUSG00000056486, ENSMUSG00000031558, ENSMUSG00000061524	198	247	22680	2.78248	0.999998	0.503731	56.8853
Annotation Cluster 6	Enrichment Score: 1.6662758666793045
Category	Term	Count	%	PValue	Genes	List Total	Pop Hits	Pop Total	Fold Enrichment	Bonferroni	Benjamini	FDR
GOTERM_BP_DIRECT	GO:0001764~neuron migration	6	2.94118	0.00666414	ENSMUSG00000031965, ENSMUSG00000033585, ENSMUSG00000034384, ENSMUSG00000061353, ENSMUSG00000015619, ENSMUSG00000015053	173	124	18082	5.05743	0.999683	0.295531	10.251
GOTERM_BP_DIRECT	GO:0001709~cell fate determination	3	1.47059	0.0124537	ENSMUSG00000034384, ENSMUSG00000015619, ENSMUSG00000015053	173	18	18082	17.42	1	0.440553	18.3481
GOTERM_BP_DIRECT	GO:0030182~neuron differentiation	4	1.96078	0.120817	ENSMUSG00000004698, ENSMUSG00000034384, ENSMUSG00000015619, ENSMUSG00000015053	173	127	18082	3.29198	1	0.901313	87.5411
Annotation Cluster 7	Enrichment Score: 1.6635301852828388
Category	Term	Count	%	PValue	Genes	List Total	Pop Hits	Pop Total	Fold Enrichment	Bonferroni	Benjamini	FDR
UP_SEQ_FEATURE	zinc finger region:GATA-type 1	3	1.47059	0.00137224	ENSMUSG00000015619, ENSMUSG00000021944, ENSMUSG00000015053	176	6	18012	51.1705	0.576675	0.0639854	2.0192
UP_SEQ_FEATURE	zinc finger region:GATA-type 2	3	1.47059	0.00137224	ENSMUSG00000015619, ENSMUSG00000021944, ENSMUSG00000015053	176	6	18012	51.1705	0.576675	0.0639854	2.0192
GOTERM_MF_DIRECT	GO:0001085~RNA polymerase II transcription factor binding	5	2.45098	0.00154246	ENSMUSG00000031965, ENSMUSG00000015619, ENSMUSG00000021944, ENSMUSG00000015053, ENSMUSG00000021095	159	55	17446	9.97484	0.376469	0.0757071	2.04776
INTERPRO	IPR000679:Zinc finger, GATA-type	3	1.47059	0.00659158	ENSMUSG00000015619, ENSMUSG00000021944, ENSMUSG00000015053	183	14	20594	24.1148	0.936986	0.179185	8.8656
SMART	SM00401:ZnF_GATA	3	1.47059	0.00843519	ENSMUSG00000015619, ENSMUSG00000021944, ENSMUSG00000015053	124	12	10425	21.0181	0.589119	0.256572	9.05228
GOTERM_MF_DIRECT	GO:0001158~enhancer sequence-specific DNA binding	3	1.47059	0.0229752	ENSMUSG00000015619, ENSMUSG00000021944, ENSMUSG00000015053	159	26	17446	12.6604	0.999185	0.546278	26.768
INTERPRO	IPR013088:Zinc finger, NHR/GATA-type	3	1.47059	0.0904512	ENSMUSG00000015619, ENSMUSG00000021944, ENSMUSG00000015053	183	57	20594	5.92292	1	0.757154	73.5744
UP_KEYWORDS	Activator	8	3.92157	0.300583	ENSMUSG00000010461, ENSMUSG00000046714, ENSMUSG00000034161, ENSMUSG00000037034, ENSMUSG00000015619, ENSMUSG00000021944, ENSMUSG00000015053, ENSMUSG00000061524	198	624	22680	1.46853	1	0.882937	98.8594
GOTERM_MF_DIRECT	GO:0008134~transcription factor binding	5	2.45098	0.374851	ENSMUSG00000004698, ENSMUSG00000015619, ENSMUSG00000021944, ENSMUSG00000073421, ENSMUSG00000015053	159	342	17446	1.60414	1	0.985417	99.8157
GOTERM_MF_DIRECT	GO:0003682~chromatin binding	5	2.45098	0.612408	ENSMUSG00000023391, ENSMUSG00000015619, ENSMUSG00000021944, ENSMUSG00000021217, ENSMUSG00000015053	159	466	17446	1.17729	1	0.998173	99.9997
Annotation Cluster 8	Enrichment Score: 1.6248874928245634
Category	Term	Count	%	PValue	Genes	List Total	Pop Hits	Pop Total	Fold Enrichment	Bonferroni	Benjamini	FDR
INTERPRO	IPR001881:EGF-like calcium-binding	6	2.94118	0.00527024	ENSMUSG00000022887, ENSMUSG00000035459, ENSMUSG00000027386, ENSMUSG00000021186, ENSMUSG00000038578, ENSMUSG00000031558	183	126	20594	5.35883	0.890166	0.168119	7.14917
INTERPRO	IPR009030:Insulin-like growth factor binding protein, N-terminal	6	2.94118	0.00600587	ENSMUSG00000035459, ENSMUSG00000024713, ENSMUSG00000021186, ENSMUSG00000035131, ENSMUSG00000038578, ENSMUSG00000031558	183	130	20594	5.19395	0.919381	0.17609	8.10843
INTERPRO	IPR013032:EGF-like, conserved site	7	3.43137	0.0082339	ENSMUSG00000022887, ENSMUSG00000035459, ENSMUSG00000027386, ENSMUSG00000021186, ENSMUSG00000038578, ENSMUSG00000029999, ENSMUSG00000031558	183	197	20594	3.99872	0.968445	0.205785	10.9579
INTERPRO	IPR018097:EGF-like calcium-binding, conserved site	5	2.45098	0.0108106	ENSMUSG00000022887, ENSMUSG00000027386, ENSMUSG00000021186, ENSMUSG00000038578, ENSMUSG00000031558	183	97	20594	5.8008	0.989363	0.247206	14.1508
UP_KEYWORDS	EGF-like domain	7	3.43137	0.013741	ENSMUSG00000022887, ENSMUSG00000035459, ENSMUSG00000027386, ENSMUSG00000021186, ENSMUSG00000038578, ENSMUSG00000029999, ENSMUSG00000031558	198	224	22680	3.57955	0.935402	0.220461	15.8978
SMART	SM00179:EGF_CA	6	2.94118	0.0165894	ENSMUSG00000022887, ENSMUSG00000035459, ENSMUSG00000027386, ENSMUSG00000021186, ENSMUSG00000038578, ENSMUSG00000031558	124	126	10425	4.00346	0.827351	0.355399	17.0872
INTERPRO	IPR000742:Epidermal growth factor-like domain	7	3.43137	0.0190089	ENSMUSG00000035459, ENSMUSG00000024713, ENSMUSG00000027386, ENSMUSG00000021186, ENSMUSG00000038578, ENSMUSG00000029999, ENSMUSG00000031558	183	237	20594	3.32383	0.999672	0.35961	23.6165
INTERPRO	IPR000152:EGF-type aspartate/asparagine hydroxylation site	4	1.96078	0.0561648	ENSMUSG00000027386, ENSMUSG00000021186, ENSMUSG00000038578, ENSMUSG00000031558	183	98	20594	4.59329	1	0.650244	55.577
UP_KEYWORDS	Sushi	3	1.47059	0.0629022	ENSMUSG00000022887, ENSMUSG00000027386, ENSMUSG00000038578	198	47	22680	7.31141	0.999997	0.510634	55.6457
SMART	SM00181:EGF	6	2.94118	0.0629057	ENSMUSG00000035459, ENSMUSG00000024713, ENSMUSG00000027386, ENSMUSG00000021186, ENSMUSG00000038578, ENSMUSG00000031558	124	181	10425	2.78694	0.99891	0.744466	51.701
INTERPRO	IPR000436:Sushi/SCR/CCP	3	1.47059	0.0877691	ENSMUSG00000022887, ENSMUSG00000027386, ENSMUSG00000038578	183	56	20594	6.02869	1	0.758808	72.4592
SMART	SM00032:CCP	3	1.47059	0.133206	ENSMUSG00000022887, ENSMUSG00000027386, ENSMUSG00000038578	124	54	10425	4.6707	1	0.882852	79.8359
Annotation Cluster 9	Enrichment Score: 1.5301353351485234
Category	Term	Count	%	PValue	Genes	List Total	Pop Hits	Pop Total	Fold Enrichment	Bonferroni	Benjamini	FDR
GOTERM_BP_DIRECT	GO:0009954~proximal/distal pattern formation	4	1.96078	0.00187214	ENSMUSG00000043342, ENSMUSG00000023391, ENSMUSG00000038227, ENSMUSG00000000938	173	26	18082	16.08	0.895445	0.131621	2.98556
GOTERM_BP_DIRECT	GO:0010468~regulation of gene expression	7	3.43137	0.0747638	ENSMUSG00000021835, ENSMUSG00000035459, ENSMUSG00000043342, ENSMUSG00000038227, ENSMUSG00000000938, ENSMUSG00000021944, ENSMUSG00000021217	173	308	18082	2.37546	1	0.829107	71.5466
GOTERM_BP_DIRECT	GO:0007338~single fertilization	3	1.47059	0.18347	ENSMUSG00000043342, ENSMUSG00000038227, ENSMUSG00000000938	173	82	18082	3.82391	1	0.945396	96.2317
Annotation Cluster 10	Enrichment Score: 1.3468725007908358
Category	Term	Count	%	PValue	Genes	List Total	Pop Hits	Pop Total	Fold Enrichment	Bonferroni	Benjamini	FDR
UP_KEYWORDS	Secreted	24	11.7647	0.020838	ENSMUSG00000029309, ENSMUSG00000024247, ENSMUSG00000027386, ENSMUSG00000061353, ENSMUSG00000035131, ENSMUSG00000029999, ENSMUSG00000047497, ENSMUSG00000027082, ENSMUSG00000031558, ENSMUSG00000041577, ENSMUSG00000022594, ENSMUSG00000038793, ENSMUSG00000032334, ENSMUSG00000021835, ENSMUSG00000028780, ENSMUSG00000022887, ENSMUSG00000029869, ENSMUSG00000024713, ENSMUSG00000021186, ENSMUSG00000039883,…	198	1685	22680	1.63151	0.98454	0.293519	23.1648
GOTERM_CC_DIRECT	GO:0005576~extracellular region	24	11.7647	0.0478102	ENSMUSG00000029309, ENSMUSG00000024247, ENSMUSG00000027386, ENSMUSG00000061353, ENSMUSG00000035131, ENSMUSG00000029999, ENSMUSG00000047497, ENSMUSG00000027082, ENSMUSG00000031558, ENSMUSG00000041577, ENSMUSG00000038793, ENSMUSG00000025888, ENSMUSG00000032334, ENSMUSG00000021835, ENSMUSG00000028780, ENSMUSG00000022887, ENSMUSG00000029869, ENSMUSG00000024713, ENSMUSG00000021186, ENSMUSG00000039883,…	180	1753	19662	1.49549	0.999781	0.699941	45.0562
GOTERM_CC_DIRECT	GO:0005615~extracellular space	20	9.80392	0.0914128	ENSMUSG00000045744, ENSMUSG00000027419, ENSMUSG00000029309, ENSMUSG00000000627, ENSMUSG00000061353, ENSMUSG00000029999, ENSMUSG00000027082, ENSMUSG00000031558, ENSMUSG00000041577, ENSMUSG00000038793, ENSMUSG00000032334, ENSMUSG00000021835, ENSMUSG00000022887, ENSMUSG00000028780, ENSMUSG00000030022, ENSMUSG00000024713, ENSMUSG00000021186, ENSMUSG00000039883, ENSMUSG00000067235, ENSMUSG00000021091	180	1504	19662	1.45257	1	0.807733	69.0203
Annotation Cluster 11	Enrichment Score: 1.247475337255085
Category	Term	Count	%	PValue	Genes	List Total	Pop Hits	Pop Total	Fold Enrichment	Bonferroni	Benjamini	FDR
KEGG_PATHWAY	mmu04145:Phagosome	7	3.43137	0.00219731	ENSMUSG00000059498, ENSMUSG00000016206, ENSMUSG00000067235, ENSMUSG00000036103, ENSMUSG00000060550, ENSMUSG00000029361, ENSMUSG00000073421	61	174	7720	5.09139	0.242071	0.242071	2.51525
INTERPRO	IPR011162:MHC classes I/II-like antigen recognition protein	5	2.45098	0.00326236	ENSMUSG00000016206, ENSMUSG00000078452, ENSMUSG00000067235, ENSMUSG00000060550, ENSMUSG00000073421	183	69	20594	8.15475	0.744847	0.116772	4.48337
KEGG_PATHWAY	mmu05332:Graft-versus-host disease	4	1.96078	0.00752862	ENSMUSG00000016206, ENSMUSG00000067235, ENSMUSG00000060550, ENSMUSG00000073421	61	52	7720	9.73518	0.614107	0.211836	8.3796
GOTERM_MF_DIRECT	GO:0042605~peptide antigen binding	4	1.96078	0.00782912	ENSMUSG00000016206, ENSMUSG00000067235, ENSMUSG00000060550, ENSMUSG00000073421	159	45	17446	9.75318	0.909747	0.259657	9.999
KEGG_PATHWAY	mmu05330:Allograft rejection	4	1.96078	0.00923857	ENSMUSG00000016206, ENSMUSG00000067235, ENSMUSG00000060550, ENSMUSG00000073421	61	56	7720	9.03981	0.689469	0.208554	10.1911
KEGG_PATHWAY	mmu04940:Type I diabetes mellitus	4	1.96078	0.012198	ENSMUSG00000016206, ENSMUSG00000067235, ENSMUSG00000060550, ENSMUSG00000073421	61	62	7720	8.16499	0.786986	0.227198	13.2491
INTERPRO	IPR011161:MHC class I-like antigen recognition	4	1.96078	0.0146791	ENSMUSG00000016206, ENSMUSG00000078452, ENSMUSG00000067235, ENSMUSG00000060550	183	58	20594	7.76107	0.997932	0.304837	18.7455
KEGG_PATHWAY	mmu05320:Autoimmune thyroid disease	4	1.96078	0.017551	ENSMUSG00000016206, ENSMUSG00000067235, ENSMUSG00000060550, ENSMUSG00000073421	61	71	7720	7.12999	0.892586	0.272923	18.5399
KEGG_PATHWAY	mmu05416:Viral myocarditis	4	1.96078	0.0232493	ENSMUSG00000016206, ENSMUSG00000067235, ENSMUSG00000060550, ENSMUSG00000073421	61	79	7720	6.40797	0.948388	0.309611	23.8467
KEGG_PATHWAY	mmu04612:Antigen processing and presentation	4	1.96078	0.0256161	ENSMUSG00000016206, ENSMUSG00000067235, ENSMUSG00000060550, ENSMUSG00000073421	61	82	7720	6.17353	0.961982	0.304621	25.9564
INTERPRO	IPR003006:Immunoglobulin/major histocompatibility complex, conserved site	4	1.96078	0.0395821	ENSMUSG00000016206, ENSMUSG00000067235, ENSMUSG00000060550, ENSMUSG00000073421	183	85	20594	5.29579	1	0.570049	43.2733
GOTERM_BP_DIRECT	GO:0002474~antigen processing and presentation of peptide antigen via MHC class I	3	1.47059	0.0458893	ENSMUSG00000016206, ENSMUSG00000067235, ENSMUSG00000060550	173	36	18082	8.71002	1	0.723762	53.2255
UP_SEQ_FEATURE	domain:Ig-like C1-type	3	1.47059	0.0476633	ENSMUSG00000067235, ENSMUSG00000060550, ENSMUSG00000073421	176	36	18012	8.52841	1	0.783158	51.5901
UP_SEQ_FEATURE	region of interest:Connecting peptide	3	1.47059	0.0525255	ENSMUSG00000067235, ENSMUSG00000060550, ENSMUSG00000073421	176	38	18012	8.07955	1	0.799788	55.1346
INTERPRO	IPR001039:MHC class I, alpha chain, alpha1/alpha2	3	1.47059	0.0600359	ENSMUSG00000016206, ENSMUSG00000067235, ENSMUSG00000060550	183	45	20594	7.50237	1	0.659836	58.0673
INTERPRO	IPR003597:Immunoglobulin C1-set	4	1.96078	0.0603927	ENSMUSG00000016206, ENSMUSG00000067235, ENSMUSG00000060550, ENSMUSG00000073421	183	101	20594	4.45685	1	0.647091	58.2902
SMART	SM00407:IGc1	4	1.96078	0.109257	ENSMUSG00000016206, ENSMUSG00000067235, ENSMUSG00000060550, ENSMUSG00000073421	124	98	10425	3.43153	0.999995	0.867972	72.637
KEGG_PATHWAY	mmu04514:Cell adhesion molecules (CAMs)	4	1.96078	0.131108	ENSMUSG00000016206, ENSMUSG00000067235, ENSMUSG00000060550, ENSMUSG00000073421	61	162	7720	3.12487	1	0.743882	80.3579
KEGG_PATHWAY	mmu05166:HTLV-I infection	5	2.45098	0.169259	ENSMUSG00000016206, ENSMUSG00000081683, ENSMUSG00000067235, ENSMUSG00000060550, ENSMUSG00000073421	61	278	7720	2.27621	1	0.747013	88.3223
GOTERM_MF_DIRECT	GO:0005102~receptor binding	7	3.43137	0.171344	ENSMUSG00000016206, ENSMUSG00000029864, ENSMUSG00000044708, ENSMUSG00000067235, ENSMUSG00000060550, ENSMUSG00000031558, ENSMUSG00000037973	159	412	17446	1.86423	1	0.926775	91.9474
GOTERM_MF_DIRECT	GO:0046982~protein heterodimerization activity	8	3.92157	0.185735	ENSMUSG00000044912, ENSMUSG00000025232, ENSMUSG00000034161, ENSMUSG00000067235, ENSMUSG00000060550, ENSMUSG00000073421, ENSMUSG00000050541, ENSMUSG00000016200	159	514	17446	1.70776	1	0.935017	93.6326
KEGG_PATHWAY	mmu05168:Herpes simplex infection	4	1.96078	0.219126	ENSMUSG00000016206, ENSMUSG00000067235, ENSMUSG00000060550, ENSMUSG00000073421	61	208	7720	2.4338	1	0.806071	94.2981
KEGG_PATHWAY	mmu05203:Viral carcinogenesis	4	1.96078	0.267019	ENSMUSG00000004698, ENSMUSG00000016206, ENSMUSG00000067235, ENSMUSG00000060550	61	231	7720	2.19147	1	0.84492	97.2604
INTERPRO	IPR007110:Immunoglobulin-like domain	11	5.39216	0.29662	ENSMUSG00000028780, ENSMUSG00000020357, ENSMUSG00000059498, ENSMUSG00000016206, ENSMUSG00000035305, ENSMUSG00000040972, ENSMUSG00000067235, ENSMUSG00000060550, ENSMUSG00000042035, ENSMUSG00000064293, ENSMUSG00000073421	183	920	20594	1.34553	1	0.976976	99.2839
UP_KEYWORDS	Immunity	5	2.45098	0.456742	ENSMUSG00000022887, ENSMUSG00000015619, ENSMUSG00000067235, ENSMUSG00000060550, ENSMUSG00000073421	198	401	22680	1.42825	1	0.931762	99.9517
GOTERM_BP_DIRECT	GO:0002376~immune system process	5	2.45098	0.496011	ENSMUSG00000022887, ENSMUSG00000015619, ENSMUSG00000067235, ENSMUSG00000060550, ENSMUSG00000073421	173	383	18082	1.36449	1	0.999586	99.9985
KEGG_PATHWAY	mmu05169:Epstein-Barr virus infection	3	1.47059	0.501469	ENSMUSG00000016206, ENSMUSG00000067235, ENSMUSG00000060550	61	215	7720	1.76592	1	0.974125	99.9684
KEGG_PATHWAY	mmu04144:Endocytosis	3	1.47059	0.642135	ENSMUSG00000016206, ENSMUSG00000067235, ENSMUSG00000060550	61	278	7720	1.36573	1	0.993125	99.9993
Annotation Cluster 12	Enrichment Score: 1.172856455784956
Category	Term	Count	%	PValue	Genes	List Total	Pop Hits	Pop Total	Fold Enrichment	Bonferroni	Benjamini	FDR
GOTERM_CC_DIRECT	GO:0005578~proteinaceous extracellular matrix	9	4.41176	0.00853208	ENSMUSG00000032334, ENSMUSG00000021835, ENSMUSG00000029309, ENSMUSG00000030022, ENSMUSG00000027386, ENSMUSG00000021186, ENSMUSG00000047497, ENSMUSG00000041577, ENSMUSG00000031558	180	316	19662	3.11108	0.77095	0.308197	9.9444
UP_KEYWORDS	Extracellular matrix	6	2.94118	0.0546046	ENSMUSG00000021835, ENSMUSG00000029309, ENSMUSG00000027386, ENSMUSG00000021186, ENSMUSG00000047497, ENSMUSG00000041577	198	235	22680	2.92456	0.999985	0.480042	50.4729
GOTERM_MF_DIRECT	GO:0008201~heparin binding	4	1.96078	0.157284	ENSMUSG00000021835, ENSMUSG00000027386, ENSMUSG00000041577, ENSMUSG00000031558	159	151	17446	2.90658	1	0.917384	89.9104
GOTERM_CC_DIRECT	GO:0031012~extracellular matrix	5	2.45098	0.277718	ENSMUSG00000032334, ENSMUSG00000021186, ENSMUSG00000047497, ENSMUSG00000041577, ENSMUSG00000028226	180	294	19662	1.85771	1	0.955345	98.1257
Annotation Cluster 13	Enrichment Score: 1.141033871268373
Category	Term	Count	%	PValue	Genes	List Total	Pop Hits	Pop Total	Fold Enrichment	Bonferroni	Benjamini	FDR
UP_SEQ_FEATURE	metal ion-binding site:Calcium 1; via carbonyl oxygen	3	1.47059	0.0452979	ENSMUSG00000022887, ENSMUSG00000036103, ENSMUSG00000059991	176	35	18012	8.77208	1	0.78288	49.7729
UP_SEQ_FEATURE	metal ion-binding site:Calcium 1	3	1.47059	0.0763699	ENSMUSG00000022887, ENSMUSG00000036103, ENSMUSG00000059991	176	47	18012	6.5324	1	0.895705	69.2762
UP_SEQ_FEATURE	metal ion-binding site:Calcium 2	3	1.47059	0.109118	ENSMUSG00000022887, ENSMUSG00000036103, ENSMUSG00000059991	176	58	18012	5.2935	1	0.944602	82.0288
Annotation Cluster 14	Enrichment Score: 0.9090858662950384
Category	Term	Count	%	PValue	Genes	List Total	Pop Hits	Pop Total	Fold Enrichment	Bonferroni	Benjamini	FDR
GOTERM_MF_DIRECT	GO:0008138~protein tyrosine/serine/threonine phosphatase activity	3	1.47059	0.0508061	ENSMUSG00000033102, ENSMUSG00000037628, ENSMUSG00000026544	159	40	17446	8.22925	1	0.765547	50.2859
GOTERM_MF_DIRECT	GO:0004725~protein tyrosine phosphatase activity	4	1.96078	0.0580383	ENSMUSG00000033102, ENSMUSG00000037628, ENSMUSG00000010461, ENSMUSG00000026544	159	97	17446	4.52467	1	0.755216	55.1298
GOTERM_MF_DIRECT	GO:0004722~protein serine/threonine phosphatase activity	3	1.47059	0.0832522	ENSMUSG00000033102, ENSMUSG00000037628, ENSMUSG00000026544	159	53	17446	6.21075	1	0.830216	68.8096
UP_KEYWORDS	Protein phosphatase	4	1.96078	0.104224	ENSMUSG00000033102, ENSMUSG00000037628, ENSMUSG00000010461, ENSMUSG00000026544	198	130	22680	3.52448	1	0.596683	74.7735
INTERPRO	IPR003595:Protein-tyrosine phosphatase, catalytic	3	1.47059	0.107026	ENSMUSG00000033102, ENSMUSG00000037628, ENSMUSG00000026544	183	63	20594	5.35883	1	0.804386	79.587
GOTERM_MF_DIRECT	GO:0004721~phosphoprotein phosphatase activity	4	1.96078	0.132056	ENSMUSG00000033102, ENSMUSG00000037628, ENSMUSG00000010461, ENSMUSG00000026544	159	139	17446	3.1575	1	0.897815	85.0177
INTERPRO	IPR000387:Protein-tyrosine/Dual specificity phosphatase	3	1.47059	0.163793	ENSMUSG00000033102, ENSMUSG00000037628, ENSMUSG00000026544	183	82	20594	4.11715	1	0.903345	91.8813
SMART	SM00404:PTPc_motif	3	1.47059	0.170155	ENSMUSG00000033102, ENSMUSG00000037628, ENSMUSG00000026544	124	63	10425	4.00346	1	0.886508	87.6215
GOTERM_BP_DIRECT	GO:0016311~dephosphorylation	3	1.47059	0.27788	ENSMUSG00000033102, ENSMUSG00000037628, ENSMUSG00000026544	173	109	18082	2.8767	1	0.984601	99.4836
GOTERM_MF_DIRECT	GO:0016791~phosphatase activity	3	1.47059	0.28967	ENSMUSG00000033102, ENSMUSG00000037628, ENSMUSG00000026544	159	118	17446	2.78957	1	0.97292	98.9789
Annotation Cluster 15	Enrichment Score: 0.8244763652909441
Category	Term	Count	%	PValue	Genes	List Total	Pop Hits	Pop Total	Fold Enrichment	Bonferroni	Benjamini	FDR
GOTERM_BP_DIRECT	GO:0050727~regulation of inflammatory response	4	1.96078	0.0203474	ENSMUSG00000030525, ENSMUSG00000047497, ENSMUSG00000033510, ENSMUSG00000025888	173	61	18082	6.85379	1	0.527941	28.2882
UP_KEYWORDS	Zymogen	6	2.94118	0.038649	ENSMUSG00000027419, ENSMUSG00000025232, ENSMUSG00000024713, ENSMUSG00000047497, ENSMUSG00000025888, ENSMUSG00000028226	198	213	22680	3.22663	0.999592	0.40565	38.9344
GOTERM_BP_DIRECT	GO:0016485~protein processing	4	1.96078	0.0488013	ENSMUSG00000027419, ENSMUSG00000024713, ENSMUSG00000025888, ENSMUSG00000028226	173	86	18082	4.86141	1	0.730349	55.4819
UP_KEYWORDS	Cleavage on pair of basic residues	6	2.94118	0.0657711	ENSMUSG00000032334, ENSMUSG00000021835, ENSMUSG00000027419, ENSMUSG00000024713, ENSMUSG00000047497, ENSMUSG00000028226	198	248	22680	2.77126	0.999999	0.490097	57.3153
UP_SEQ_FEATURE	region of interest:Catalytic	3	1.47059	0.0763699	ENSMUSG00000027419, ENSMUSG00000024713, ENSMUSG00000033510	176	47	18012	6.5324	1	0.895705	69.2762
GOTERM_MF_DIRECT	GO:0004175~endopeptidase activity	4	1.96078	0.0815198	ENSMUSG00000027419, ENSMUSG00000030022, ENSMUSG00000024713, ENSMUSG00000025888	159	112	17446	3.91869	1	0.844112	68.0102
GOTERM_BP_DIRECT	GO:0006508~proteolysis	8	3.92157	0.318045	ENSMUSG00000022887, ENSMUSG00000027419, ENSMUSG00000030022, ENSMUSG00000024713, ENSMUSG00000047497, ENSMUSG00000033510, ENSMUSG00000025888, ENSMUSG00000028226	173	582	18082	1.4367	1	0.991394	99.7954
UP_SEQ_FEATURE	active site:Charge relay system	4	1.96078	0.321339	ENSMUSG00000022887, ENSMUSG00000027419, ENSMUSG00000024713, ENSMUSG00000024781	176	205	18012	1.9969	1	0.998818	99.6844
GOTERM_MF_DIRECT	GO:0008233~peptidase activity	7	3.43137	0.325742	ENSMUSG00000022887, ENSMUSG00000027419, ENSMUSG00000024713, ENSMUSG00000047497, ENSMUSG00000033510, ENSMUSG00000025888, ENSMUSG00000028226	159	516	17446	1.48849	1	0.979566	99.4922
UP_KEYWORDS	Protease	7	3.43137	0.328976	ENSMUSG00000022887, ENSMUSG00000027419, ENSMUSG00000024713, ENSMUSG00000047497, ENSMUSG00000033510, ENSMUSG00000025888, ENSMUSG00000028226	198	542	22680	1.47937	1	0.90205	99.3209
GOTERM_MF_DIRECT	GO:0008236~serine-type peptidase activity	3	1.47059	0.437101	ENSMUSG00000022887, ENSMUSG00000027419, ENSMUSG00000024713	159	163	17446	2.01945	1	0.992438	99.9548
UP_KEYWORDS	Serine protease	3	1.47059	0.444382	ENSMUSG00000022887, ENSMUSG00000027419, ENSMUSG00000024713	198	173	22680	1.98634	1	0.94146	99.936
GOTERM_MF_DIRECT	GO:0004252~serine-type endopeptidase activity	3	1.47059	0.572374	ENSMUSG00000022887, ENSMUSG00000027419, ENSMUSG00000024713	159	212	17446	1.55269	1	0.997631	99.9989
Annotation Cluster 16	Enrichment Score: 0.8106320740914866
Category	Term	Count	%	PValue	Genes	List Total	Pop Hits	Pop Total	Fold Enrichment	Bonferroni	Benjamini	FDR
GOTERM_CC_DIRECT	GO:0045202~synapse	12	5.88235	0.00668476	ENSMUSG00000030525, ENSMUSG00000029309, ENSMUSG00000030255, ENSMUSG00000038665, ENSMUSG00000000627, ENSMUSG00000003657, ENSMUSG00000029009, ENSMUSG00000029211, ENSMUSG00000056296, ENSMUSG00000033676, ENSMUSG00000029361, ENSMUSG00000104252	180	505	19662	2.59564	0.684513	0.31924	7.87172
KEGG_PATHWAY	mmu05033:Nicotine addiction	3	1.47059	0.038359	ENSMUSG00000030525, ENSMUSG00000029211, ENSMUSG00000033676	61	40	7720	9.4918	0.992762	0.389109	36.426
INTERPRO	IPR018000:Neurotransmitter-gated ion-channel, conserved site	3	1.47059	0.0508683	ENSMUSG00000030525, ENSMUSG00000029211, ENSMUSG00000033676	183	41	20594	8.23431	1	0.646256	51.9467
GOTERM_CC_DIRECT	GO:0045211~postsynaptic membrane	6	2.94118	0.0526979	ENSMUSG00000030525, ENSMUSG00000030255, ENSMUSG00000000627, ENSMUSG00000029211, ENSMUSG00000033676, ENSMUSG00000032452	180	222	19662	2.95225	0.99991	0.68775	48.4062
GOTERM_MF_DIRECT	GO:0005230~extracellular ligand-gated ion channel activity	3	1.47059	0.0531019	ENSMUSG00000030525, ENSMUSG00000029211, ENSMUSG00000033676	159	41	17446	8.02853	1	0.751267	51.8736
INTERPRO	IPR006202:Neurotransmitter-gated ion-channel ligand-binding	3	1.47059	0.0531092	ENSMUSG00000030525, ENSMUSG00000029211, ENSMUSG00000033676	183	42	20594	8.03825	1	0.645433	53.515
INTERPRO	IPR006201:Neurotransmitter-gated ion-channel	3	1.47059	0.0531092	ENSMUSG00000030525, ENSMUSG00000029211, ENSMUSG00000033676	183	42	20594	8.03825	1	0.645433	53.515
INTERPRO	IPR006029:Neurotransmitter-gated ion-channel transmembrane domain	3	1.47059	0.0531092	ENSMUSG00000030525, ENSMUSG00000029211, ENSMUSG00000033676	183	42	20594	8.03825	1	0.645433	53.515
UP_KEYWORDS	Ligand-gated ion channel	3	1.47059	0.132502	ENSMUSG00000030525, ENSMUSG00000029211, ENSMUSG00000033676	198	73	22680	4.70735	1	0.634009	83.1137
KEGG_PATHWAY	mmu04080:Neuroactive ligand-receptor interaction	5	2.45098	0.179996	ENSMUSG00000011171, ENSMUSG00000030525, ENSMUSG00000029211, ENSMUSG00000033676, ENSMUSG00000050541	61	285	7720	2.2203	1	0.750707	89.9555
UP_KEYWORDS	Postsynaptic cell membrane	4	1.96078	0.197435	ENSMUSG00000030525, ENSMUSG00000030255, ENSMUSG00000029211, ENSMUSG00000033676	198	176	22680	2.60331	1	0.76581	93.6214
UP_KEYWORDS	Synapse	5	2.45098	0.376878	ENSMUSG00000030525, ENSMUSG00000030255, ENSMUSG00000029211, ENSMUSG00000056296, ENSMUSG00000033676	198	357	22680	1.60428	1	0.925843	99.7312
UP_KEYWORDS	Ion transport	7	3.43137	0.450159	ENSMUSG00000030525, ENSMUSG00000025189, ENSMUSG00000029211, ENSMUSG00000044708, ENSMUSG00000033676, ENSMUSG00000031129, ENSMUSG00000015653	198	619	22680	1.29534	1	0.940379	99.9438
GOTERM_MF_DIRECT	GO:0005216~ion channel activity	3	1.47059	0.453593	ENSMUSG00000030525, ENSMUSG00000029211, ENSMUSG00000033676	159	170	17446	1.93629	1	0.993252	99.9697
GOTERM_CC_DIRECT	GO:0030054~cell junction	8	3.92157	0.481157	ENSMUSG00000030525, ENSMUSG00000022485, ENSMUSG00000030255, ENSMUSG00000039546, ENSMUSG00000029211, ENSMUSG00000024044, ENSMUSG00000056296, ENSMUSG00000033676	180	718	19662	1.21708	1	0.989049	99.9671
GOTERM_BP_DIRECT	GO:0006811~ion transport	7	3.43137	0.482492	ENSMUSG00000030525, ENSMUSG00000025189, ENSMUSG00000029211, ENSMUSG00000044708, ENSMUSG00000033676, ENSMUSG00000031129, ENSMUSG00000015653	173	584	18082	1.25281	1	0.999479	99.9976
UP_KEYWORDS	Cell junction	7	3.43137	0.514316	ENSMUSG00000030525, ENSMUSG00000030255, ENSMUSG00000039546, ENSMUSG00000029211, ENSMUSG00000024044, ENSMUSG00000056296, ENSMUSG00000033676	198	661	22680	1.21304	1	0.949159	99.9881
UP_KEYWORDS	Ion channel	4	1.96078	0.561295	ENSMUSG00000030525, ENSMUSG00000029211, ENSMUSG00000044708, ENSMUSG00000033676	198	336	22680	1.36364	1	0.959188	99.9967
GOTERM_BP_DIRECT	GO:0006810~transport	17	8.33333	0.669802	ENSMUSG00000030525, ENSMUSG00000050822, ENSMUSG00000028354, ENSMUSG00000024247, ENSMUSG00000037762, ENSMUSG00000034435, ENSMUSG00000056296, ENSMUSG00000027015, ENSMUSG00000039194, ENSMUSG00000015653, ENSMUSG00000044708, ENSMUSG00000029211, ENSMUSG00000025189, ENSMUSG00000033676, ENSMUSG00000031129, ENSMUSG00000029851, ENSMUSG00000028789	173	1822	18082	0.975216	1	0.999984	100
UP_KEYWORDS	Transport	16	7.84314	0.689064	ENSMUSG00000030525, ENSMUSG00000050822, ENSMUSG00000028354, ENSMUSG00000024247, ENSMUSG00000037762, ENSMUSG00000034435, ENSMUSG00000027015, ENSMUSG00000039194, ENSMUSG00000015653, ENSMUSG00000044708, ENSMUSG00000029211, ENSMUSG00000025189, ENSMUSG00000033676, ENSMUSG00000031129, ENSMUSG00000029851, ENSMUSG00000028789	198	1901	22680	0.964086	1	0.983922	100
Annotation Cluster 17	Enrichment Score: 0.74312007771187
Category	Term	Count	%	PValue	Genes	List Total	Pop Hits	Pop Total	Fold Enrichment	Bonferroni	Benjamini	FDR
UP_SEQ_FEATURE	domain:Ig-like C2-type 6	3	1.47059	0.0363001	ENSMUSG00000020357, ENSMUSG00000042035, ENSMUSG00000064293	176	31	18012	9.90396	1	0.723604	42.2628
UP_SEQ_FEATURE	domain:Ig-like C2-type 5	3	1.47059	0.0791981	ENSMUSG00000020357, ENSMUSG00000042035, ENSMUSG00000064293	176	48	18012	6.39631	1	0.894148	70.6445
UP_SEQ_FEATURE	domain:Ig-like C2-type 4	3	1.47059	0.102916	ENSMUSG00000020357, ENSMUSG00000042035, ENSMUSG00000064293	176	56	18012	5.48255	1	0.941152	80.0779
UP_KEYWORDS	Immunoglobulin domain	8	3.92157	0.12724	ENSMUSG00000028780, ENSMUSG00000020357, ENSMUSG00000059498, ENSMUSG00000000627, ENSMUSG00000035305, ENSMUSG00000040972, ENSMUSG00000042035, ENSMUSG00000064293	198	481	22680	1.90512	1	0.645274	81.7862
UP_SEQ_FEATURE	domain:Ig-like C2-type 1	4	1.96078	0.137456	ENSMUSG00000020357, ENSMUSG00000059498, ENSMUSG00000042035, ENSMUSG00000064293	176	132	18012	3.10124	1	0.971568	88.8818
UP_SEQ_FEATURE	domain:Ig-like C2-type 2	4	1.96078	0.139685	ENSMUSG00000020357, ENSMUSG00000059498, ENSMUSG00000042035, ENSMUSG00000064293	176	133	18012	3.07792	1	0.965396	89.301
INTERPRO	IPR013098:Immunoglobulin I-set	4	1.96078	0.141038	ENSMUSG00000028780, ENSMUSG00000020357, ENSMUSG00000035305, ENSMUSG00000064293	183	147	20594	3.06219	1	0.879763	88.165
INTERPRO	IPR013783:Immunoglobulin-like fold	14	6.86275	0.175417	ENSMUSG00000022146, ENSMUSG00000060550, ENSMUSG00000028780, ENSMUSG00000020357, ENSMUSG00000029869, ENSMUSG00000059498, ENSMUSG00000016206, ENSMUSG00000035305, ENSMUSG00000040972, ENSMUSG00000067235, ENSMUSG00000042035, ENSMUSG00000064293, ENSMUSG00000073421, ENSMUSG00000068758	183	1099	20594	1.43357	1	0.91311	93.3296
UP_SEQ_FEATURE	domain:Ig-like C2-type 3	3	1.47059	0.210694	ENSMUSG00000020357, ENSMUSG00000042035, ENSMUSG00000064293	176	88	18012	3.48889	1	0.990231	97.0243
INTERPRO	IPR007110:Immunoglobulin-like domain	11	5.39216	0.29662	ENSMUSG00000028780, ENSMUSG00000020357, ENSMUSG00000059498, ENSMUSG00000016206, ENSMUSG00000035305, ENSMUSG00000040972, ENSMUSG00000067235, ENSMUSG00000060550, ENSMUSG00000042035, ENSMUSG00000064293, ENSMUSG00000073421	183	920	20594	1.34553	1	0.976976	99.2839
INTERPRO	IPR003599:Immunoglobulin subtype	7	3.43137	0.309131	ENSMUSG00000028780, ENSMUSG00000020357, ENSMUSG00000059498, ENSMUSG00000035305, ENSMUSG00000040972, ENSMUSG00000042035, ENSMUSG00000064293	183	518	20594	1.52075	1	0.979026	99.4434
INTERPRO	IPR003598:Immunoglobulin subtype 2	4	1.96078	0.361547	ENSMUSG00000028780, ENSMUSG00000020357, ENSMUSG00000035305, ENSMUSG00000064293	183	242	20594	1.86009	1	0.988503	99.8161
SMART	SM00408:IGc2	4	1.96078	0.547142	ENSMUSG00000028780, ENSMUSG00000020357, ENSMUSG00000035305, ENSMUSG00000064293	124	242	10425	1.38963	1	0.997371	99.986
SMART	SM00409:IG	7	3.43137	0.577579	ENSMUSG00000028780, ENSMUSG00000020357, ENSMUSG00000059498, ENSMUSG00000035305, ENSMUSG00000040972, ENSMUSG00000042035, ENSMUSG00000064293	124	518	10425	1.13612	1	0.9976	99.9936
Annotation Cluster 18	Enrichment Score: 0.5776116644727963
Category	Term	Count	%	PValue	Genes	List Total	Pop Hits	Pop Total	Fold Enrichment	Bonferroni	Benjamini	FDR
INTERPRO	IPR003591:Leucine-rich repeat, typical subtype	5	2.45098	0.0698308	ENSMUSG00000090958, ENSMUSG00000048304, ENSMUSG00000039883, ENSMUSG00000041577, ENSMUSG00000031558	183	175	20594	3.2153	1	0.687699	63.8014
INTERPRO	IPR000483:Cysteine-rich flanking region, C-terminal	3	1.47059	0.145294	ENSMUSG00000048304, ENSMUSG00000039883, ENSMUSG00000031558	183	76	20594	4.44219	1	0.8796	88.9621
SMART	SM00369:LRR_TYP	5	2.45098	0.152203	ENSMUSG00000090958, ENSMUSG00000048304, ENSMUSG00000039883, ENSMUSG00000041577, ENSMUSG00000031558	124	175	10425	2.40207	1	0.885494	84.2682
UP_SEQ_FEATURE	repeat:LRR 12	3	1.47059	0.178991	ENSMUSG00000048304, ENSMUSG00000041577, ENSMUSG00000031558	176	79	18012	3.88636	1	0.981363	94.6588
INTERPRO	IPR001611:Leucine-rich repeat	5	2.45098	0.196849	ENSMUSG00000090958, ENSMUSG00000048304, ENSMUSG00000039883, ENSMUSG00000041577, ENSMUSG00000031558	183	259	20594	2.1725	1	0.92155	95.391
UP_SEQ_FEATURE	repeat:LRR 11	3	1.47059	0.210694	ENSMUSG00000048304, ENSMUSG00000041577, ENSMUSG00000031558	176	88	18012	3.48889	1	0.990231	97.0243
SMART	SM00082:LRRCT	3	1.47059	0.221569	ENSMUSG00000048304, ENSMUSG00000039883, ENSMUSG00000031558	124	75	10425	3.3629	1	0.927921	93.9531
UP_SEQ_FEATURE	repeat:LRR 10	3	1.47059	0.264494	ENSMUSG00000048304, ENSMUSG00000041577, ENSMUSG00000031558	176	103	18012	2.9808	1	0.997054	98.9574
UP_SEQ_FEATURE	repeat:LRR 2	5	2.45098	0.277005	ENSMUSG00000038070, ENSMUSG00000048304, ENSMUSG00000039883, ENSMUSG00000041577, ENSMUSG00000031558	176	274	18012	1.86753	1	0.997451	99.1919
UP_SEQ_FEATURE	repeat:LRR 1	5	2.45098	0.277005	ENSMUSG00000038070, ENSMUSG00000048304, ENSMUSG00000039883, ENSMUSG00000041577, ENSMUSG00000031558	176	274	18012	1.86753	1	0.997451	99.1919
UP_SEQ_FEATURE	repeat:LRR 5	4	1.96078	0.3312	ENSMUSG00000048304, ENSMUSG00000039883, ENSMUSG00000041577, ENSMUSG00000031558	176	210	18012	1.94935	1	0.998893	99.746
UP_SEQ_FEATURE	repeat:LRR 9	3	1.47059	0.336151	ENSMUSG00000048304, ENSMUSG00000041577, ENSMUSG00000031558	176	123	18012	2.49612	1	0.998828	99.7726
UP_SEQ_FEATURE	repeat:LRR 8	3	1.47059	0.374762	ENSMUSG00000048304, ENSMUSG00000041577, ENSMUSG00000031558	176	134	18012	2.29121	1	0.999088	99.9066
UP_SEQ_FEATURE	repeat:LRR 4	4	1.96078	0.382015	ENSMUSG00000048304, ENSMUSG00000039883, ENSMUSG00000041577, ENSMUSG00000031558	176	228	18012	1.79545	1	0.999094	99.9215
UP_KEYWORDS	Leucine-rich repeat	4	1.96078	0.431076	ENSMUSG00000048304, ENSMUSG00000039883, ENSMUSG00000041577, ENSMUSG00000031558	198	275	22680	1.66612	1	0.942927	99.9139
UP_SEQ_FEATURE	repeat:LRR 3	4	1.96078	0.446692	ENSMUSG00000048304, ENSMUSG00000039883, ENSMUSG00000041577, ENSMUSG00000031558	176	253	18012	1.61804	1	0.999623	99.9848
UP_SEQ_FEATURE	repeat:LRR 7	3	1.47059	0.455475	ENSMUSG00000048304, ENSMUSG00000041577, ENSMUSG00000031558	176	158	18012	1.94318	1	0.999639	99.988
UP_SEQ_FEATURE	repeat:LRR 6	3	1.47059	0.556246	ENSMUSG00000048304, ENSMUSG00000041577, ENSMUSG00000031558	176	191	18012	1.60745	1	0.999932	99.9994
Annotation Cluster 19	Enrichment Score: 0.5174672072238149
Category	Term	Count	%	PValue	Genes	List Total	Pop Hits	Pop Total	Fold Enrichment	Bonferroni	Benjamini	FDR
UP_KEYWORDS	Growth factor	4	1.96078	0.0989084	ENSMUSG00000021835, ENSMUSG00000061353, ENSMUSG00000029999, ENSMUSG00000038793	198	127	22680	3.60773	1	0.60833	72.8351
GOTERM_MF_DIRECT	GO:0008083~growth factor activity	4	1.96078	0.144499	ENSMUSG00000021835, ENSMUSG00000061353, ENSMUSG00000029999, ENSMUSG00000038793	159	145	17446	3.02685	1	0.908172	87.654
UP_KEYWORDS	Cytokine	3	1.47059	0.517786	ENSMUSG00000021835, ENSMUSG00000061353, ENSMUSG00000038793	198	200	22680	1.71818	1	0.947516	99.9891
GOTERM_MF_DIRECT	GO:0005125~cytokine activity	3	1.47059	0.579722	ENSMUSG00000021835, ENSMUSG00000061353, ENSMUSG00000038793	159	214	17446	1.53818	1	0.997591	99.9991
KEGG_PATHWAY	mmu05200:Pathways in cancer	4	1.96078	0.602832	ENSMUSG00000021835, ENSMUSG00000061353, ENSMUSG00000081683, ENSMUSG00000029999	61	397	7720	1.27514	1	0.990476	99.9977
Annotation Cluster 20	Enrichment Score: 0.5137918371073195
Category	Term	Count	%	PValue	Genes	List Total	Pop Hits	Pop Total	Fold Enrichment	Bonferroni	Benjamini	FDR
INTERPRO	IPR024079:Metallopeptidase, catalytic domain	3	1.47059	0.211549	ENSMUSG00000030022, ENSMUSG00000047497, ENSMUSG00000028226	183	97	20594	3.48048	1	0.931792	96.4438
GOTERM_MF_DIRECT	GO:0004222~metalloendopeptidase activity	3	1.47059	0.306399	ENSMUSG00000030022, ENSMUSG00000047497, ENSMUSG00000028226	159	123	17446	2.67618	1	0.976049	99.2581
GOTERM_BP_DIRECT	GO:0006508~proteolysis	8	3.92157	0.318045	ENSMUSG00000022887, ENSMUSG00000027419, ENSMUSG00000030022, ENSMUSG00000024713, ENSMUSG00000047497, ENSMUSG00000033510, ENSMUSG00000025888, ENSMUSG00000028226	173	582	18082	1.4367	1	0.991394	99.7954
GOTERM_MF_DIRECT	GO:0008237~metallopeptidase activity	3	1.47059	0.427215	ENSMUSG00000030022, ENSMUSG00000047497, ENSMUSG00000028226	159	160	17446	2.05731	1	0.992341	99.9429
Annotation Cluster 21	Enrichment Score: 0.49971540414626525
Category	Term	Count	%	PValue	Genes	List Total	Pop Hits	Pop Total	Fold Enrichment	Bonferroni	Benjamini	FDR
GOTERM_CC_DIRECT	GO:0031225~anchored component of membrane	4	1.96078	0.137797	ENSMUSG00000074093, ENSMUSG00000078452, ENSMUSG00000064293, ENSMUSG00000022594	180	141	19662	3.09882	1	0.880583	83.6735
UP_KEYWORDS	GPI-anchor	3	1.47059	0.343736	ENSMUSG00000078452, ENSMUSG00000064293, ENSMUSG00000022594	198	140	22680	2.45455	1	0.907703	99.4859
UP_SEQ_FEATURE	propeptide:Removed in mature form	4	1.96078	0.407962	ENSMUSG00000029999, ENSMUSG00000078452, ENSMUSG00000064293, ENSMUSG00000022594	176	238	18012	1.72002	1	0.999319	99.9585
UP_KEYWORDS	Lipoprotein	8	3.92157	0.518862	ENSMUSG00000074093, ENSMUSG00000032377, ENSMUSG00000037754, ENSMUSG00000029999, ENSMUSG00000078452, ENSMUSG00000064293, ENSMUSG00000022594, ENSMUSG00000050541	198	780	22680	1.17483	1	0.944819	99.9894
Annotation Cluster 22	Enrichment Score: 0.435578957977035
Category	Term	Count	%	PValue	Genes	List Total	Pop Hits	Pop Total	Fold Enrichment	Bonferroni	Benjamini	FDR
INTERPRO	IPR003961:Fibronectin, type III	4	1.96078	0.286494	ENSMUSG00000029869, ENSMUSG00000022146, ENSMUSG00000064293, ENSMUSG00000068758	183	211	20594	2.13337	1	0.975601	99.1248
UP_SEQ_FEATURE	domain:Fibronectin type-III 2	3	1.47059	0.339693	ENSMUSG00000029869, ENSMUSG00000022146, ENSMUSG00000064293	176	124	18012	2.47599	1	0.998722	99.7899
UP_SEQ_FEATURE	domain:Fibronectin type-III 1	3	1.47059	0.343229	ENSMUSG00000029869, ENSMUSG00000022146, ENSMUSG00000064293	176	125	18012	2.45618	1	0.998612	99.8061
SMART	SM00060:FN3	3	1.47059	0.541874	ENSMUSG00000029869, ENSMUSG00000022146, ENSMUSG00000064293	124	153	10425	1.64848	1	0.998173	99.9841
Annotation Cluster 23	Enrichment Score: 0.41052027890401094
Category	Term	Count	%	PValue	Genes	List Total	Pop Hits	Pop Total	Fold Enrichment	Bonferroni	Benjamini	FDR
UP_KEYWORDS	Flavoprotein	4	1.96078	0.104224	ENSMUSG00000029009, ENSMUSG00000018659, ENSMUSG00000029361, ENSMUSG00000015653	198	130	22680	3.52448	1	0.596683	74.7735
UP_KEYWORDS	FAD	3	1.47059	0.273474	ENSMUSG00000029009, ENSMUSG00000029361, ENSMUSG00000015653	198	118	22680	2.91217	1	0.861486	98.1643
UP_SEQ_FEATURE	metal ion-binding site:Iron (heme axial ligand)	3	1.47059	0.304054	ENSMUSG00000029361, ENSMUSG00000027015, ENSMUSG00000015653	176	114	18012	2.69318	1	0.998471	99.5414
UP_KEYWORDS	Heme	3	1.47059	0.437397	ENSMUSG00000029361, ENSMUSG00000027015, ENSMUSG00000015653	198	171	22680	2.00957	1	0.94199	99.9251
UP_KEYWORDS	NADP	3	1.47059	0.450328	ENSMUSG00000025007, ENSMUSG00000029009, ENSMUSG00000029361	198	175	22680	1.96364	1	0.936428	99.944
GOTERM_MF_DIRECT	GO:0016491~oxidoreductase activity	7	3.43137	0.467721	ENSMUSG00000032334, ENSMUSG00000025007, ENSMUSG00000029009, ENSMUSG00000018659, ENSMUSG00000029361, ENSMUSG00000027015, ENSMUSG00000015653	159	604	17446	1.27163	1	0.9929	99.9787
UP_KEYWORDS	Oxidoreductase	7	3.43137	0.481449	ENSMUSG00000032334, ENSMUSG00000025007, ENSMUSG00000029009, ENSMUSG00000018659, ENSMUSG00000029361, ENSMUSG00000027015, ENSMUSG00000015653	198	639	22680	1.2548	1	0.940795	99.973
GOTERM_BP_DIRECT	GO:0055114~oxidation-reduction process	7	3.43137	0.625775	ENSMUSG00000032334, ENSMUSG00000025007, ENSMUSG00000029009, ENSMUSG00000018659, ENSMUSG00000029361, ENSMUSG00000027015, ENSMUSG00000015653	173	676	18082	1.08231	1	0.99996	100
UP_KEYWORDS	Iron	3	1.47059	0.839699	ENSMUSG00000029361, ENSMUSG00000027015, ENSMUSG00000015653	198	375	22680	0.916364	1	0.99653	100
Annotation Cluster 24	Enrichment Score: 0.2897104450272529
Category	Term	Count	%	PValue	Genes	List Total	Pop Hits	Pop Total	Fold Enrichment	Bonferroni	Benjamini	FDR
UP_KEYWORDS	Palmitate	4	1.96078	0.500032	ENSMUSG00000032377, ENSMUSG00000037754, ENSMUSG00000029999, ENSMUSG00000050541	198	304	22680	1.50718	1	0.946085	99.9829
UP_KEYWORDS	Lipoprotein	8	3.92157	0.518862	ENSMUSG00000074093, ENSMUSG00000032377, ENSMUSG00000037754, ENSMUSG00000029999, ENSMUSG00000078452, ENSMUSG00000064293, ENSMUSG00000022594, ENSMUSG00000050541	198	780	22680	1.17483	1	0.944819	99.9894
UP_SEQ_FEATURE	lipid moiety-binding region:S-palmitoyl cysteine	3	1.47059	0.520977	ENSMUSG00000032377, ENSMUSG00000029999, ENSMUSG00000050541	176	179	18012	1.71521	1	0.999881	99.9982
Annotation Cluster 25	Enrichment Score: 0.27262307802585306
Category	Term	Count	%	PValue	Genes	List Total	Pop Hits	Pop Total	Fold Enrichment	Bonferroni	Benjamini	FDR
GOTERM_CC_DIRECT	GO:0005783~endoplasmic reticulum	16	7.84314	0.224817	ENSMUSG00000029314, ENSMUSG00000103442, ENSMUSG00000042686, ENSMUSG00000028351, ENSMUSG00000028354, ENSMUSG00000074093, ENSMUSG00000037669, ENSMUSG00000000627, ENSMUSG00000035131, ENSMUSG00000029330, ENSMUSG00000060550, ENSMUSG00000054150, ENSMUSG00000104148, ENSMUSG00000067235, ENSMUSG00000032452, ENSMUSG00000104252	180	1323	19662	1.32104	1	0.935272	95.5528
GOTERM_CC_DIRECT	GO:0005789~endoplasmic reticulum membrane	6	2.94118	0.778639	ENSMUSG00000029314, ENSMUSG00000042686, ENSMUSG00000028354, ENSMUSG00000074093, ENSMUSG00000029330, ENSMUSG00000032452	180	710	19662	0.923099	1	0.999698	100
UP_KEYWORDS	Endoplasmic reticulum	7	3.43137	0.868891	ENSMUSG00000029314, ENSMUSG00000042686, ENSMUSG00000037669, ENSMUSG00000074093, ENSMUSG00000029330, ENSMUSG00000032452, ENSMUSG00000054150	198	997	22680	0.804231	1	0.997304	100
Annotation Cluster 26	Enrichment Score: 0.2713681955288923
Category	Term	Count	%	PValue	Genes	List Total	Pop Hits	Pop Total	Fold Enrichment	Bonferroni	Benjamini	FDR
GOTERM_BP_DIRECT	GO:0007050~cell cycle arrest	3	1.47059	0.180053	ENSMUSG00000028351, ENSMUSG00000037628, ENSMUSG00000035131	173	81	18082	3.87112	1	0.943981	95.9684
UP_KEYWORDS	Cell cycle	4	1.96078	0.91169	ENSMUSG00000028351, ENSMUSG00000037628, ENSMUSG00000022432, ENSMUSG00000035131	198	626	22680	0.73192	1	0.998737	100
GOTERM_BP_DIRECT	GO:0007049~cell cycle	4	1.96078	0.934647	ENSMUSG00000028351, ENSMUSG00000037628, ENSMUSG00000022432, ENSMUSG00000035131	173	614	18082	0.680914	1	1	100
Annotation Cluster 27	Enrichment Score: 0.24146864749668465
Category	Term	Count	%	PValue	Genes	List Total	Pop Hits	Pop Total	Fold Enrichment	Bonferroni	Benjamini	FDR
INTERPRO	IPR018247:EF-Hand 1, calcium-binding site	3	1.47059	0.457897	ENSMUSG00000029309, ENSMUSG00000003657, ENSMUSG00000052415	183	175	20594	1.92918	1	0.996612	99.9815
INTERPRO	IPR002048:EF-hand domain	3	1.47059	0.590427	ENSMUSG00000029309, ENSMUSG00000003657, ENSMUSG00000052415	183	223	20594	1.51393	1	0.999507	99.9996
INTERPRO	IPR011992:EF-hand-like domain	3	1.47059	0.697686	ENSMUSG00000029309, ENSMUSG00000003657, ENSMUSG00000052415	183	273	20594	1.23665	1	0.99992	100
Annotation Cluster 28	Enrichment Score: 0.21041593763264663
Category	Term	Count	%	PValue	Genes	List Total	Pop Hits	Pop Total	Fold Enrichment	Bonferroni	Benjamini	FDR
UP_KEYWORDS	Lipid biosynthesis	3	1.47059	0.406406	ENSMUSG00000029314, ENSMUSG00000029330, ENSMUSG00000035686	198	160	22680	2.14773	1	0.938643	99.8536
UP_KEYWORDS	Lipid metabolism	4	1.96078	0.705017	ENSMUSG00000029314, ENSMUSG00000029330, ENSMUSG00000024781, ENSMUSG00000035686	198	417	22680	1.09876	1	0.984512	100
GOTERM_BP_DIRECT	GO:0006629~lipid metabolic process	4	1.96078	0.815817	ENSMUSG00000029314, ENSMUSG00000029330, ENSMUSG00000024781, ENSMUSG00000035686	173	459	18082	0.910852	1	1	100
Annotation Cluster 29	Enrichment Score: 0.186793485385379
Category	Term	Count	%	PValue	Genes	List Total	Pop Hits	Pop Total	Fold Enrichment	Bonferroni	Benjamini	FDR
INTERPRO	IPR002110:Ankyrin repeat	3	1.47059	0.610233	ENSMUSG00000032702, ENSMUSG00000038665, ENSMUSG00000037754	183	232	20594	1.4552	1	0.999557	99.9998
UP_KEYWORDS	ANK repeat	3	1.47059	0.619139	ENSMUSG00000032702, ENSMUSG00000038665, ENSMUSG00000037754	198	240	22680	1.43182	1	0.972848	99.9994
INTERPRO	IPR020683:Ankyrin repeat-containing domain	3	1.47059	0.633194	ENSMUSG00000032702, ENSMUSG00000038665, ENSMUSG00000037754	183	242	20594	1.39507	1	0.999685	99.9999
SMART	SM00248:ANK	3	1.47059	0.748179	ENSMUSG00000032702, ENSMUSG00000038665, ENSMUSG00000037754	124	225	10425	1.12097	1	0.999883	100
Annotation Cluster 30	Enrichment Score: 0.1857843905757996
Category	Term	Count	%	PValue	Genes	List Total	Pop Hits	Pop Total	Fold Enrichment	Bonferroni	Benjamini	FDR
UP_KEYWORDS	DNA damage	4	1.96078	0.561295	ENSMUSG00000020287, ENSMUSG00000033102, ENSMUSG00000028354, ENSMUSG00000010461	198	336	22680	1.36364	1	0.959188	99.9967
GOTERM_BP_DIRECT	GO:0006974~cellular response to DNA damage stimulus	5	2.45098	0.568788	ENSMUSG00000020287, ENSMUSG00000033102, ENSMUSG00000037628, ENSMUSG00000028354, ENSMUSG00000010461	173	420	18082	1.24429	1	0.999862	99.9999
UP_KEYWORDS	DNA repair	3	1.47059	0.69984	ENSMUSG00000020287, ENSMUSG00000033102, ENSMUSG00000010461	198	279	22680	1.23167	1	0.984707	100
GOTERM_BP_DIRECT	GO:0006281~DNA repair	3	1.47059	0.80858	ENSMUSG00000020287, ENSMUSG00000033102, ENSMUSG00000010461	173	318	18082	0.98604	1	1	100
Annotation Cluster 31	Enrichment Score: 0.15146224462556632
Category	Term	Count	%	PValue	Genes	List Total	Pop Hits	Pop Total	Fold Enrichment	Bonferroni	Benjamini	FDR
GOTERM_BP_DIRECT	GO:0007169~transmembrane receptor protein tyrosine kinase signaling pathway	3	1.47059	0.246155	ENSMUSG00000020357, ENSMUSG00000029869, ENSMUSG00000035305	173	100	18082	3.13561	1	0.975302	98.9648
INTERPRO	IPR001245:Serine-threonine/tyrosine-protein kinase catalytic domain	3	1.47059	0.348249	ENSMUSG00000020357, ENSMUSG00000029869, ENSMUSG00000035305	183	139	20594	2.42882	1	0.987278	99.7544
INTERPRO	IPR000719:Protein kinase, catalytic domain	6	2.94118	0.479372	ENSMUSG00000020357, ENSMUSG00000029869, ENSMUSG00000023809, ENSMUSG00000024247, ENSMUSG00000035305, ENSMUSG00000029123	183	515	20594	1.31109	1	0.997345	99.9895
GOTERM_MF_DIRECT	GO:0004672~protein kinase activity	6	2.94118	0.528309	ENSMUSG00000020357, ENSMUSG00000029869, ENSMUSG00000023809, ENSMUSG00000024247, ENSMUSG00000035305, ENSMUSG00000029123	159	531	17446	1.23981	1	0.995809	99.9958
INTERPRO	IPR011009:Protein kinase-like domain	6	2.94118	0.547175	ENSMUSG00000020357, ENSMUSG00000029869, ENSMUSG00000023809, ENSMUSG00000024247, ENSMUSG00000035305, ENSMUSG00000029123	183	556	20594	1.21441	1	0.999129	99.9985
GOTERM_BP_DIRECT	GO:0006468~protein phosphorylation	6	2.94118	0.644064	ENSMUSG00000020357, ENSMUSG00000029869, ENSMUSG00000023809, ENSMUSG00000024247, ENSMUSG00000035305, ENSMUSG00000029123	173	576	18082	1.08875	1	0.999974	100
UP_SEQ_FEATURE	domain:Protein kinase	5	2.45098	0.722575	ENSMUSG00000020357, ENSMUSG00000029869, ENSMUSG00000024247, ENSMUSG00000035305, ENSMUSG00000029123	176	502	18012	1.01933	1	0.999999	100
UP_KEYWORDS	Kinase	6	2.94118	0.738887	ENSMUSG00000020357, ENSMUSG00000025007, ENSMUSG00000023809, ENSMUSG00000024247, ENSMUSG00000038665, ENSMUSG00000029123	198	707	22680	0.972097	1	0.988961	100
UP_KEYWORDS	Transferase	13	6.37255	0.78071	ENSMUSG00000029314, ENSMUSG00000020357, ENSMUSG00000025007, ENSMUSG00000023809, ENSMUSG00000024247, ENSMUSG00000038665, ENSMUSG00000029864, ENSMUSG00000060988, ENSMUSG00000029330, ENSMUSG00000029123, ENSMUSG00000027313, ENSMUSG00000025190, ENSMUSG00000033318	198	1654	22680	0.900297	1	0.992739	100
GOTERM_MF_DIRECT	GO:0016740~transferase activity	12	5.88235	0.788482	ENSMUSG00000029314, ENSMUSG00000020357, ENSMUSG00000025007, ENSMUSG00000023809, ENSMUSG00000024247, ENSMUSG00000029864, ENSMUSG00000060988, ENSMUSG00000029330, ENSMUSG00000029123, ENSMUSG00000027313, ENSMUSG00000025190, ENSMUSG00000033318	159	1472	17446	0.894483	1	0.999873	100
GOTERM_BP_DIRECT	GO:0016310~phosphorylation	5	2.45098	0.838145	ENSMUSG00000020357, ENSMUSG00000025007, ENSMUSG00000023809, ENSMUSG00000024247, ENSMUSG00000029123	173	612	18082	0.853923	1	1	100
UP_KEYWORDS	ATP-binding	10	4.90196	0.843441	ENSMUSG00000020357, ENSMUSG00000029869, ENSMUSG00000025007, ENSMUSG00000023809, ENSMUSG00000024247, ENSMUSG00000038665, ENSMUSG00000035305, ENSMUSG00000022432, ENSMUSG00000029123, ENSMUSG00000044708	198	1363	22680	0.840392	1	0.996477	100
GOTERM_MF_DIRECT	GO:0016301~kinase activity	5	2.45098	0.864156	ENSMUSG00000020357, ENSMUSG00000025007, ENSMUSG00000023809, ENSMUSG00000024247, ENSMUSG00000029123	159	674	17446	0.813971	1	0.999985	100
INTERPRO	IPR017441:Protein kinase, ATP binding site	3	1.47059	0.865915	ENSMUSG00000020357, ENSMUSG00000023809, ENSMUSG00000029123	183	394	20594	0.856869	1	1	100
UP_SEQ_FEATURE	nucleotide phosphate-binding region:ATP	7	3.43137	0.911429	ENSMUSG00000020357, ENSMUSG00000029869, ENSMUSG00000023809, ENSMUSG00000035305, ENSMUSG00000022432, ENSMUSG00000029123, ENSMUSG00000044708	176	963	18012	0.743911	1	1	100
UP_SEQ_FEATURE	binding site:ATP	4	1.96078	0.925541	ENSMUSG00000020357, ENSMUSG00000023809, ENSMUSG00000035305, ENSMUSG00000029123	176	583	18012	0.702167	1	1	100
GOTERM_MF_DIRECT	GO:0005524~ATP binding	10	4.90196	0.935937	ENSMUSG00000020357, ENSMUSG00000029869, ENSMUSG00000025007, ENSMUSG00000023809, ENSMUSG00000024247, ENSMUSG00000038665, ENSMUSG00000035305, ENSMUSG00000022432, ENSMUSG00000029123, ENSMUSG00000044708	159	1507	17446	0.728091	1	0.999999	100
UP_KEYWORDS	Nucleotide-binding	11	5.39216	0.945306	ENSMUSG00000020357, ENSMUSG00000029869, ENSMUSG00000025007, ENSMUSG00000023809, ENSMUSG00000024247, ENSMUSG00000038665, ENSMUSG00000035305, ENSMUSG00000022432, ENSMUSG00000029123, ENSMUSG00000044708, ENSMUSG00000032565	198	1754	22680	0.718358	1	0.999432	100
GOTERM_MF_DIRECT	GO:0000166~nucleotide binding	12	5.88235	0.96999	ENSMUSG00000020357, ENSMUSG00000029869, ENSMUSG00000025007, ENSMUSG00000023809, ENSMUSG00000090919, ENSMUSG00000024247, ENSMUSG00000035305, ENSMUSG00000022432, ENSMUSG00000029123, ENSMUSG00000044708, ENSMUSG00000008489, ENSMUSG00000032565	159	1936	17446	0.680103	1	1	100
UP_SEQ_FEATURE	active site:Proton acceptor	4	1.96078	0.970851	ENSMUSG00000020357, ENSMUSG00000023809, ENSMUSG00000035305, ENSMUSG00000029123	176	710	18012	0.576569	1	1	100
Annotation Cluster 32	Enrichment Score: 0.11451721001050247
Category	Term	Count	%	PValue	Genes	List Total	Pop Hits	Pop Total	Fold Enrichment	Bonferroni	Benjamini	FDR
UP_SEQ_FEATURE	zinc finger region:C2H2-type 5	3	1.47059	0.560051	ENSMUSG00000049164, ENSMUSG00000021217, ENSMUSG00000061524	176	194	18012	1.58259	1	0.999927	99.9995
UP_SEQ_FEATURE	zinc finger region:C2H2-type 4	3	1.47059	0.620577	ENSMUSG00000049164, ENSMUSG00000021217, ENSMUSG00000061524	176	215	18012	1.42801	1	0.99998	99.9999
UP_SEQ_FEATURE	zinc finger region:C2H2-type 3	3	1.47059	0.723719	ENSMUSG00000048387, ENSMUSG00000049164, ENSMUSG00000061524	176	261	18012	1.17633	1	0.999999	100
UP_SEQ_FEATURE	zinc finger region:C2H2-type 1	3	1.47059	0.727618	ENSMUSG00000048387, ENSMUSG00000049164, ENSMUSG00000021217	176	263	18012	1.16739	1	0.999999	100
UP_SEQ_FEATURE	zinc finger region:C2H2-type 2	3	1.47059	0.737165	ENSMUSG00000048387, ENSMUSG00000049164, ENSMUSG00000021217	176	268	18012	1.14561	1	0.999999	100
INTERPRO	IPR015880:Zinc finger, C2H2-like	4	1.96078	0.946932	ENSMUSG00000048387, ENSMUSG00000049164, ENSMUSG00000021217, ENSMUSG00000061524	183	693	20594	0.649556	1	1	100
INTERPRO	IPR007087:Zinc finger, C2H2	4	1.96078	0.958881	ENSMUSG00000048387, ENSMUSG00000049164, ENSMUSG00000021217, ENSMUSG00000061524	183	731	20594	0.615789	1	1	100
SMART	SM00355:ZnF_C2H2	4	1.96078	0.990189	ENSMUSG00000048387, ENSMUSG00000049164, ENSMUSG00000021217, ENSMUSG00000061524	124	693	10425	0.485267	1	1	100
Annotation Cluster 33	Enrichment Score: 0.10452368713790887
Category	Term	Count	%	PValue	Genes	List Total	Pop Hits	Pop Total	Fold Enrichment	Bonferroni	Benjamini	FDR
UP_KEYWORDS	Metal-binding	29	14.2157	0.647744	ENSMUSG00000021684, ENSMUSG00000015619, ENSMUSG00000027015, ENSMUSG00000015053, ENSMUSG00000015653, ENSMUSG00000028226, ENSMUSG00000032565, ENSMUSG00000022887, ENSMUSG00000026730, ENSMUSG00000048387, ENSMUSG00000003657, ENSMUSG00000060988, ENSMUSG00000036103, ENSMUSG00000021944, ENSMUSG00000021217, ENSMUSG00000029309, ENSMUSG00000010461, ENSMUSG00000047497, ENSMUSG00000029123, ENSMUSG00000049164,…	198	3395	22680	0.978444	1	0.978199	99.9998
GOTERM_MF_DIRECT	GO:0046872~metal ion binding	28	13.7255	0.782275	ENSMUSG00000010461, ENSMUSG00000029309, ENSMUSG00000021684, ENSMUSG00000047497, ENSMUSG00000029123, ENSMUSG00000049164, ENSMUSG00000015619, ENSMUSG00000052551, ENSMUSG00000027015, ENSMUSG00000033510, ENSMUSG00000056486, ENSMUSG00000015653, ENSMUSG00000015053, ENSMUSG00000032565, ENSMUSG00000028226, ENSMUSG00000022887, ENSMUSG00000032334, ENSMUSG00000026730, ENSMUSG00000048387, ENSMUSG00000003657,…	159	3355	17446	0.915723	1	0.999873	100
UP_KEYWORDS	Zinc	13	6.37255	0.958664	ENSMUSG00000047497, ENSMUSG00000049164, ENSMUSG00000015619, ENSMUSG00000052551, ENSMUSG00000033510, ENSMUSG00000056486, ENSMUSG00000015053, ENSMUSG00000028226, ENSMUSG00000048387, ENSMUSG00000021944, ENSMUSG00000021217, ENSMUSG00000042213, ENSMUSG00000061524	198	2099	22680	0.709429	1	0.99966	100
Annotation Cluster 34	Enrichment Score: 0.05509618696746687
Category	Term	Count	%	PValue	Genes	List Total	Pop Hits	Pop Total	Fold Enrichment	Bonferroni	Benjamini	FDR
GOTERM_MF_DIRECT	GO:0008270~zinc ion binding	9	4.41176	0.764686	ENSMUSG00000026730, ENSMUSG00000030022, ENSMUSG00000047497, ENSMUSG00000015619, ENSMUSG00000021944, ENSMUSG00000033510, ENSMUSG00000015053, ENSMUSG00000028226, ENSMUSG00000042213	159	1075	17446	0.918613	1	0.99983	100
UP_KEYWORDS	Zinc-finger	10	4.90196	0.932314	ENSMUSG00000048387, ENSMUSG00000049164, ENSMUSG00000015619, ENSMUSG00000021944, ENSMUSG00000056486, ENSMUSG00000033510, ENSMUSG00000021217, ENSMUSG00000015053, ENSMUSG00000061524, ENSMUSG00000042213	198	1565	22680	0.73192	1	0.999102	100
UP_KEYWORDS	Zinc	13	6.37255	0.958664	ENSMUSG00000047497, ENSMUSG00000049164, ENSMUSG00000015619, ENSMUSG00000052551, ENSMUSG00000033510, ENSMUSG00000056486, ENSMUSG00000015053, ENSMUSG00000028226, ENSMUSG00000048387, ENSMUSG00000021944, ENSMUSG00000021217, ENSMUSG00000042213, ENSMUSG00000061524	198	2099	22680	0.709429	1	0.99966	100
Annotation Cluster 35	Enrichment Score: 0.04309924942749886
Category	Term	Count	%	PValue	Genes	List Total	Pop Hits	Pop Total	Fold Enrichment	Bonferroni	Benjamini	FDR
GOTERM_BP_DIRECT	GO:0007165~signal transduction	12	5.88235	0.654623	ENSMUSG00000011171, ENSMUSG00000042659, ENSMUSG00000030525, ENSMUSG00000041907, ENSMUSG00000029309, ENSMUSG00000021684, ENSMUSG00000045967, ENSMUSG00000081683, ENSMUSG00000015619, ENSMUSG00000059810, ENSMUSG00000056486, ENSMUSG00000050541	173	1255	18082	0.999397	1	0.999977	100
GOTERM_MF_DIRECT	GO:0004871~signal transducer activity	5	2.45098	0.843044	ENSMUSG00000011171, ENSMUSG00000041907, ENSMUSG00000045967, ENSMUSG00000081683, ENSMUSG00000050541	159	648	17446	0.84663	1	0.999972	100
GOTERM_BP_DIRECT	GO:0007186~G-protein coupled receptor signaling pathway	7	3.43137	0.999249	ENSMUSG00000011171, ENSMUSG00000041907, ENSMUSG00000045967, ENSMUSG00000081683, ENSMUSG00000048960, ENSMUSG00000059810, ENSMUSG00000050541	173	1706	18082	0.428864	1	1	100
UP_KEYWORDS	G-protein coupled receptor	5	2.45098	0.999878	ENSMUSG00000011171, ENSMUSG00000041907, ENSMUSG00000045967, ENSMUSG00000081683, ENSMUSG00000050541	198	1741	22680	0.328965	1	1	100
UP_KEYWORDS	Transducer	5	2.45098	0.999923	ENSMUSG00000011171, ENSMUSG00000041907, ENSMUSG00000045967, ENSMUSG00000081683, ENSMUSG00000050541	198	1801	22680	0.318005	1	1	100
GOTERM_MF_DIRECT	GO:0004930~G-protein coupled receptor activity	5	2.45098	0.999943	ENSMUSG00000011171, ENSMUSG00000041907, ENSMUSG00000045967, ENSMUSG00000081683, ENSMUSG00000050541	159	1749	17446	0.313674	1	1	100
